# Supplementary material for: Pyrazolines as potential anti-Alzheimer's agents: DFT, molecular docking, enzyme inhibition and pharmacokinetic studies
Source: Royal Society of Chemistry journal article supplement (doi:10.1039/d2md00262k), 2022-01-01

Supplementary Material

**Pyrazolines as potential anti-alzheimer's agents: DFT, molecular docking,  
enzyme inhibition and pharmacokinetic studies**

Valkiria Machado<sup>1</sup>, Arthur R. Cenci<sup>1</sup>, Kerolain F. Teixeira<sup>1</sup>, Larissa Sens<sup>2</sup>, Tiago Tizziani<sup>2</sup>, Ricardo J. Nunes<sup>2</sup>, Leonardo L. G. Ferreira<sup>3</sup>, Rosendo A. Yunes<sup>2</sup>, Louis P. Sandjo<sup>2</sup>, Adriano D. Andricopulo<sup>3</sup> and Aldo S. de Oliveira<sup>1\*</sup>

<sup>1</sup> Department of Exact Sciences and Education, Federal University of Santa Catarina, Blumenau-SC, Brazil

<sup>2</sup> Department of Chemistry, Federal University of Santa Catarina, Florianopolis-SC, Brazil

<sup>3</sup> Center for Research & Innovation in Biodiversity & Drug Discovery, Institute of Physics of Sao Carlos, University of Sao Paulo, São Carlos-SP, Brazil

Figure Index

|                                                                                   |    |
|-----------------------------------------------------------------------------------|----|
| Figure 1. <sup>1</sup> H NMR (400 MHz, CDCl <sub>3</sub> ) of compound 1a. ....   | 3  |
| Figure 2. <sup>13</sup> C NMR (100 MHz, CDCl <sub>3</sub> ) of compound 1a. ....  | 4  |
| Figure 3. HR-ESI-MS of compound 1a. ....                                          | 4  |
| Figure 4. <sup>1</sup> H NMR (200 MHz, CDCl <sub>3</sub> ) of compound 1b. ....   | 5  |
| Figure 5. <sup>13</sup> C NMR (50 MHz, CDCl <sub>3</sub> ) of compound 1b. ....   | 6  |
| Figure 6. HR-ESI-MS of compound 1b. ....                                          | 6  |
| Figure 7. <sup>1</sup> H NMR (200 MHz, CDCl <sub>3</sub> ) of compound 1c. ....   | 7  |
| Figure 8. <sup>13</sup> C NMR (100 MHz, CDCl <sub>3</sub> ) of compound 1c. ....  | 8  |
| Figure 9. HR-ESI-MS of compound 1c. ....                                          | 8  |
| Figure 10. <sup>1</sup> H NMR (200 MHz, CDCl <sub>3</sub> ) of compound 1d. ....  | 9  |
| Figure 11. <sup>13</sup> C NMR (100 MHz, CDCl <sub>3</sub> ) of compound 1d. .... | 10 |
| Figure 12. HR-ESI-MS of compound 1d. ....                                         | 10 |
| Figure 13. <sup>1</sup> H NMR (200 MHz, CDCl <sub>3</sub> ) of compound 1e. ....  | 11 |
| Figure 14. HR-ESI-MS of compound 1e. ....                                         | 12 |
| Figure 15. <sup>1</sup> H NMR (200 MHz, CDCl <sub>3</sub> ) of compound 1f. ....  | 13 |
| Figure 16. <sup>13</sup> C NMR (50 MHz, CDCl <sub>3</sub> ) of compound 1f. ....  | 14 |
| Figure 17. HR-ESI-MS of compound 1f. ....                                         | 15 |
| Figure 18. <sup>1</sup> H NMR (200 MHz, CDCl <sub>3</sub> ) of compound 1g. ....  | 15 |
| Figure 19. <sup>13</sup> C NMR (50 MHz, CDCl <sub>3</sub> ) of compound 1g. ....  | 16 |
| Figure 20. HR-ESI-MS of compound 1g. ....                                         | 16 |
| Figure 21. <sup>1</sup> H NMR (200 MHz, CDCl <sub>3</sub> ) of compound 1h. ....  | 17 |
| Figure 22. <sup>13</sup> C NMR (50 MHz, CDCl <sub>3</sub> ) of compound 1h. ....  | 18 |
| Figure 23. HR-ESI-MS of compound 1h. ....                                         | 18 |
| Figure 24. <sup>1</sup> H NMR (200 MHz, CDCl <sub>3</sub> ) of compound 1i. ....  | 19 |
| Figure 25. <sup>13</sup> C NMR (50 MHz, CDCl <sub>3</sub> ) of compound 1i. ....  | 20 |
| Figure 26. HR-ESI-MS of compound 1i. ....                                         | 20 |
| Figure 27. <sup>1</sup> H NMR (200 MHz, CDCl <sub>3</sub> ) of compound 2a. ....  | 21 |
| Figure 28. <sup>13</sup> C NMR (50 MHz, CDCl <sub>3</sub> ) of compound 2a. ....  | 22 |
| Figure 29. HR-ESI-MS of compound 2a. ....                                         | 23 |
| Figure 30. <sup>1</sup> H NMR (400 MHz, CDCl <sub>3</sub> ) of compound 2b. ....  | 23 |
| Figure 31. <sup>13</sup> C NMR (100 MHz, CDCl <sub>3</sub> ) of compound 2b. .... | 24 |
| Figure 32. HR-ESI-MS of compound 2b. ....                                         | 24 |
| Figure 33. <sup>1</sup> H NMR (400 MHz, CDCl <sub>3</sub> ) of compound 2c. ....  | 25 |
| Figure 34. <sup>13</sup> C NMR (100 MHz, CDCl <sub>3</sub> ) of compound 2c. .... | 26 |
| Figure 35. HR-ESI-MS of compound 2c. ....                                         | 26 |
| Figure 36. <sup>1</sup> H NMR (200 MHz, CDCl <sub>3</sub> ) of compound 2d. ....  | 28 |
| Figure 37. <sup>13</sup> C NMR (50 MHz, CDCl <sub>3</sub> ) of compound 2d. ....  | 28 |
| Figure 38. HR-ESI-MS of compound 2d. ....                                         | 29 |

|                                                                                  |    |
|----------------------------------------------------------------------------------|----|
| Figure 39. <sup>1</sup> H NMR (200 MHz, CDCl <sub>3</sub> ) of compound 2e. .... | 30 |
| Figure 40. <sup>13</sup> C NMR (50 MHz, CDCl <sub>3</sub> ) of compound 2e. .... | 30 |
| Figure 41. HR-ESI-MS of compound 2e. ....                                        | 31 |
| Figure 42. <sup>1</sup> H NMR (200 MHz, CDCl <sub>3</sub> ) of compound 2f. .... | 32 |
| Figure 43. <sup>13</sup> C NMR (50 MHz, CDCl <sub>3</sub> ) of compound 2f. .... | 32 |
| Figure 44. HR-ESI-MS of compound 2f. ....                                        | 33 |
| Figure 45. <sup>1</sup> H NMR (200 MHz, CDCl <sub>3</sub> ) of compound 2g. .... | 34 |
| Figure 46. <sup>13</sup> C NMR (50 MHz, CDCl <sub>3</sub> ) of compound 2g. .... | 34 |
| Figure 47. HR-ESI-MS of compound 2g. ....                                        | 35 |
| Figure 48. <sup>1</sup> H NMR (200 MHz, CDCl <sub>3</sub> ) of compound 2h. .... | 36 |
| Figure 49. <sup>13</sup> C NMR (50 MHz, CDCl <sub>3</sub> ) of compound 2h. .... | 36 |
| Figure 50. HR-ESI-MS of compound 2h. ....                                        | 37 |
| Figure 51. <sup>1</sup> H NMR (200 MHz, CDCl <sub>3</sub> ) of compound 2i. .... | 38 |
| Figure 52. <sup>13</sup> C NMR (50 MHz, CDCl <sub>3</sub> ) of compound 2i. .... | 38 |
| Figure 53. HR-ESI-MS of compound 2i. ....                                        | 39 |

Figure 1.  $^1\text{H}$  NMR (400 MHz,  $\text{CDCl}_3$ ) of compound **1a**.

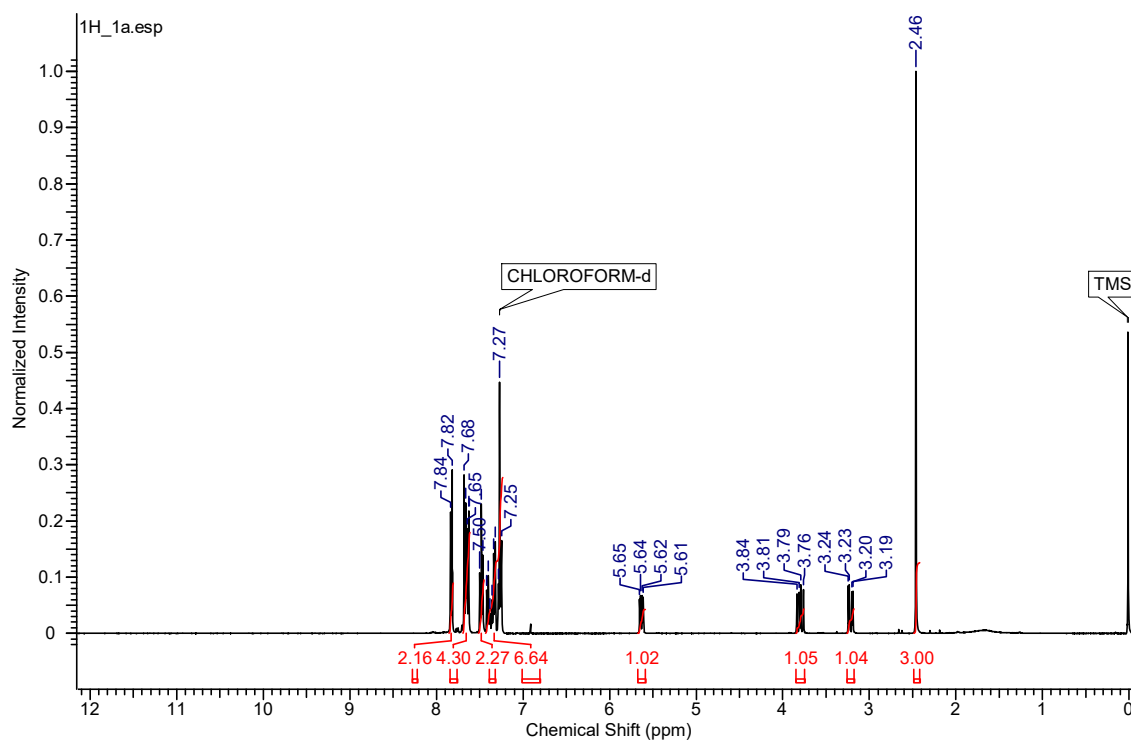

Figure 2.  $^{13}\text{C}$  NMR (100 MHz,  $\text{CDCl}_3$ ) of compound **1a**.

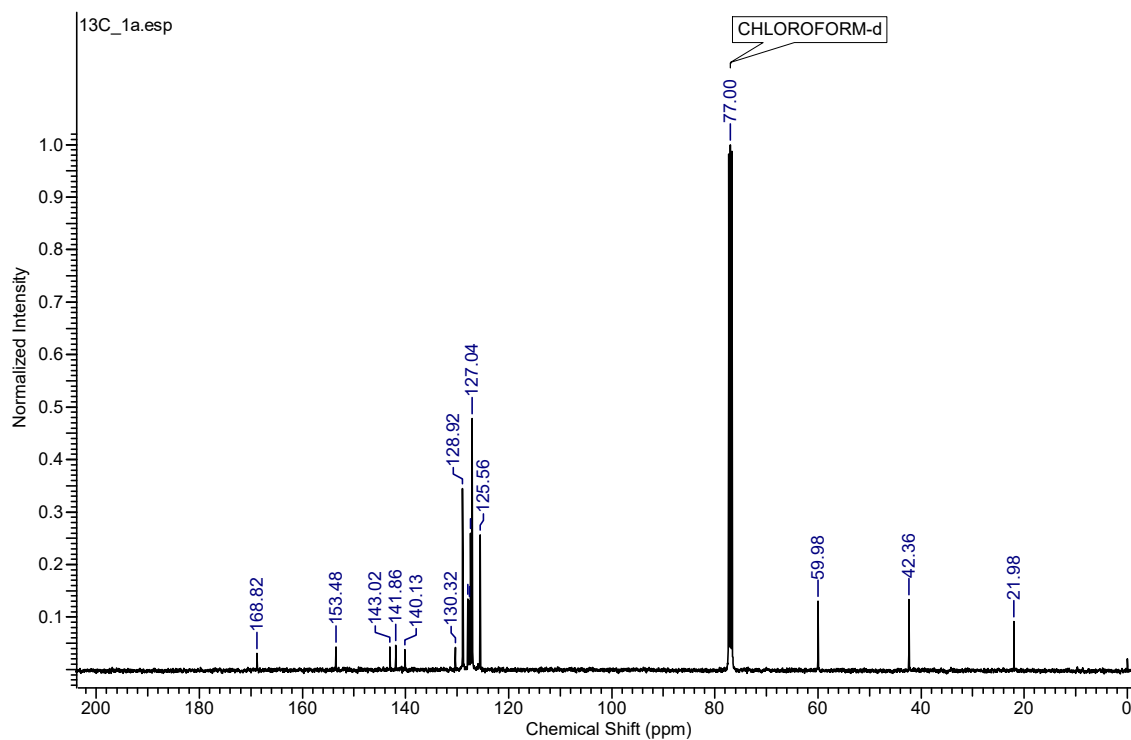

Figure 3. HR-ESI-MS of compound **1a**.

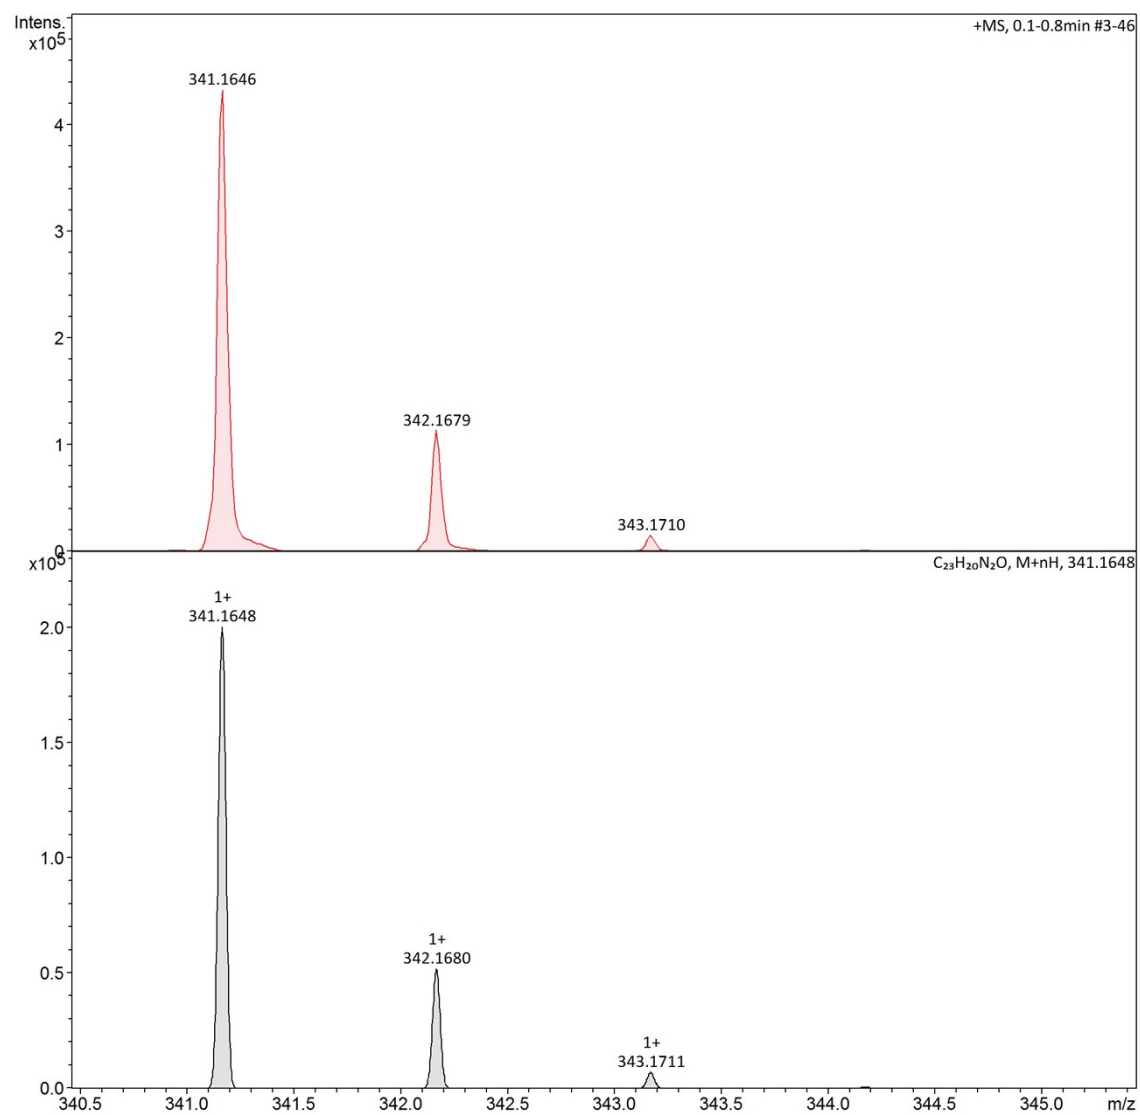

Figure 4.  $^1\text{H}$  NMR (200 MHz,  $\text{CDCl}_3$ ) of compound **1b**.

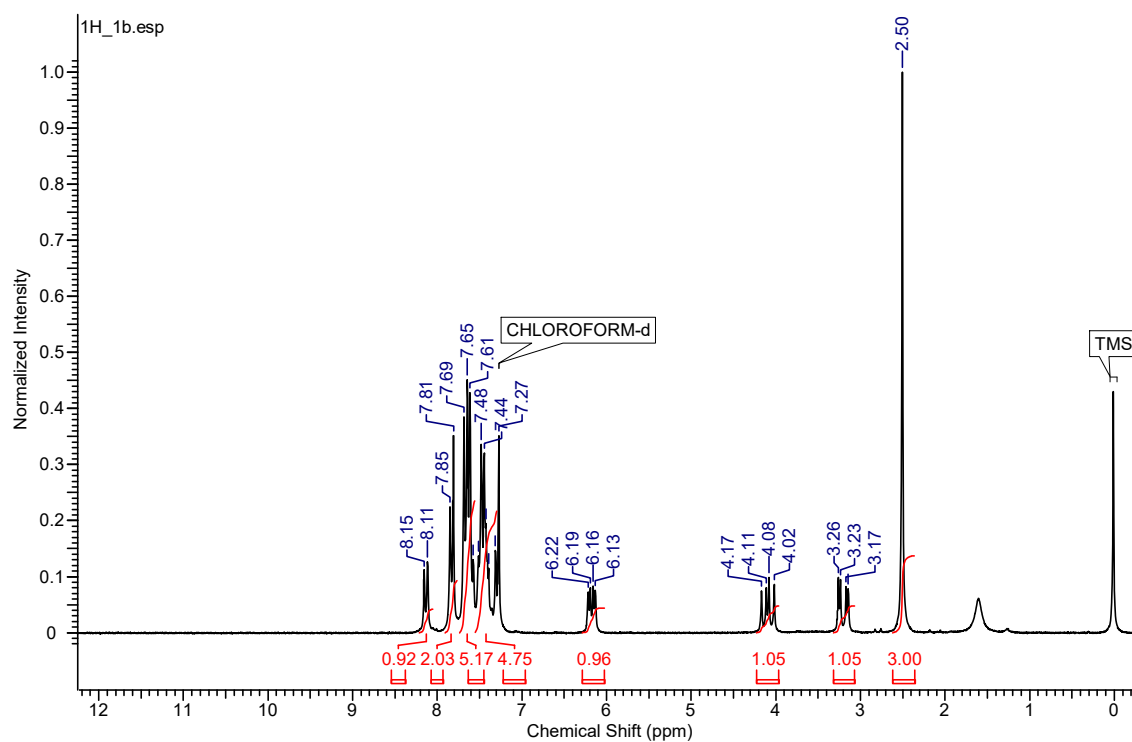

Figure 5.  $^{13}\text{C}$  NMR (50 MHz,  $\text{CDCl}_3$ ) of compound **1b**.

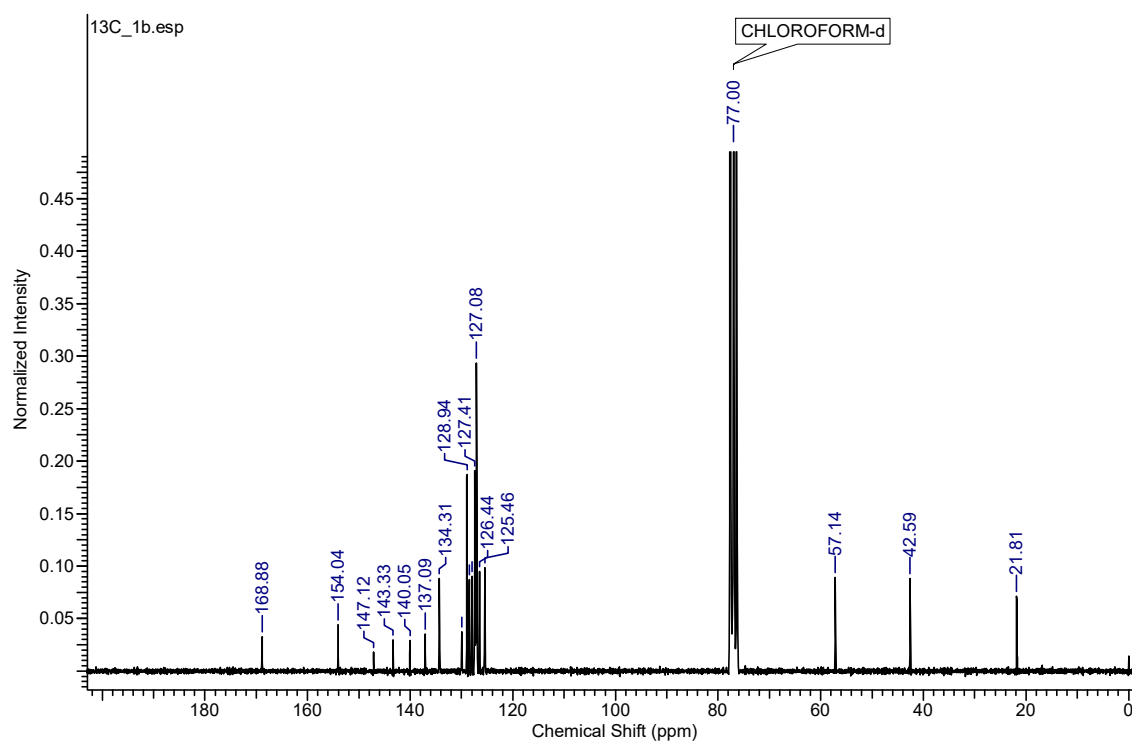

Figure 6. HR-ESI-MS of compound **1b**.

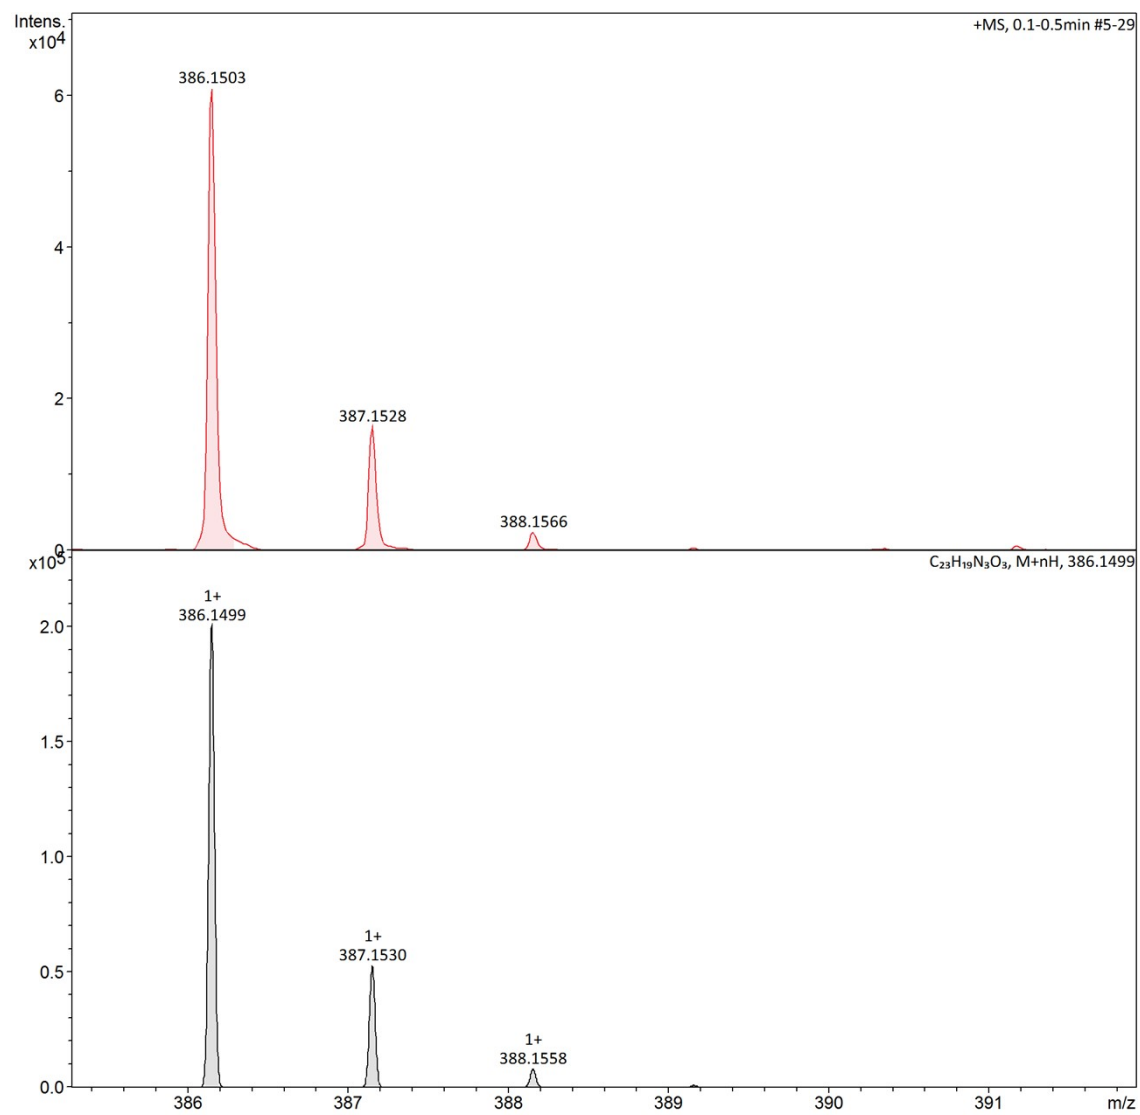

Figure 7.  $^1\text{H}$  NMR (200 MHz,  $\text{CDCl}_3$ ) of compound **1c**.

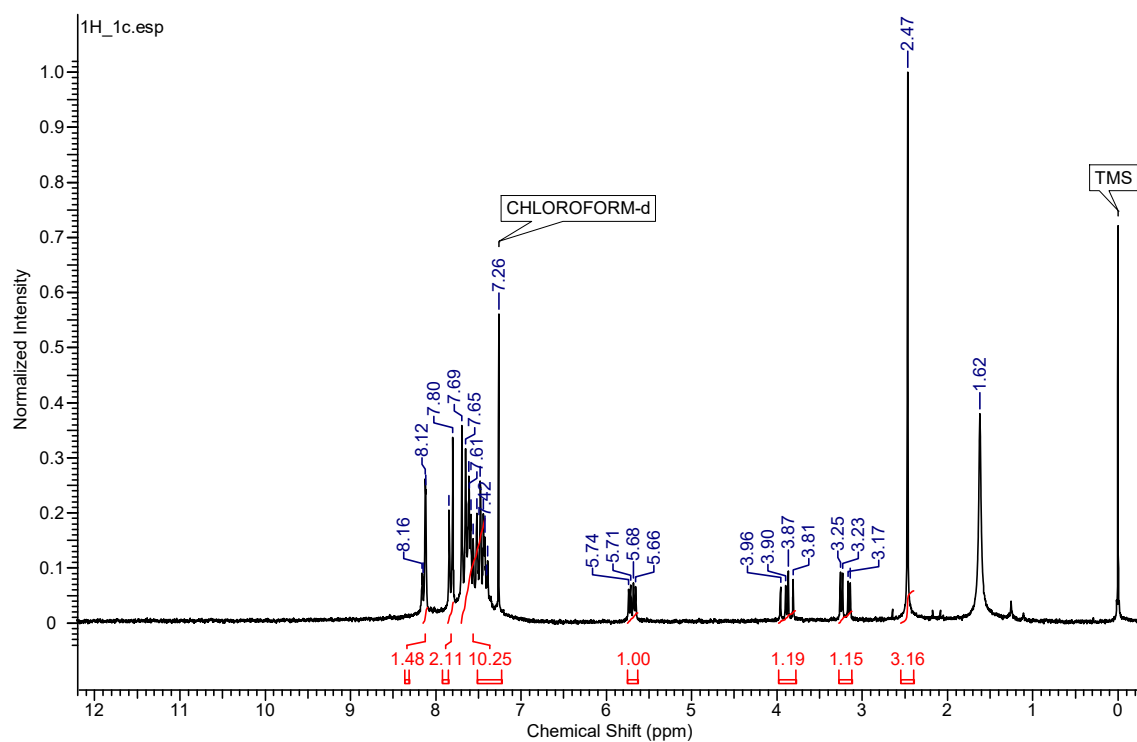

Figure 8.  $^{13}\text{C}$  NMR (100 MHz,  $\text{CDCl}_3$ ) of compound **1c**.

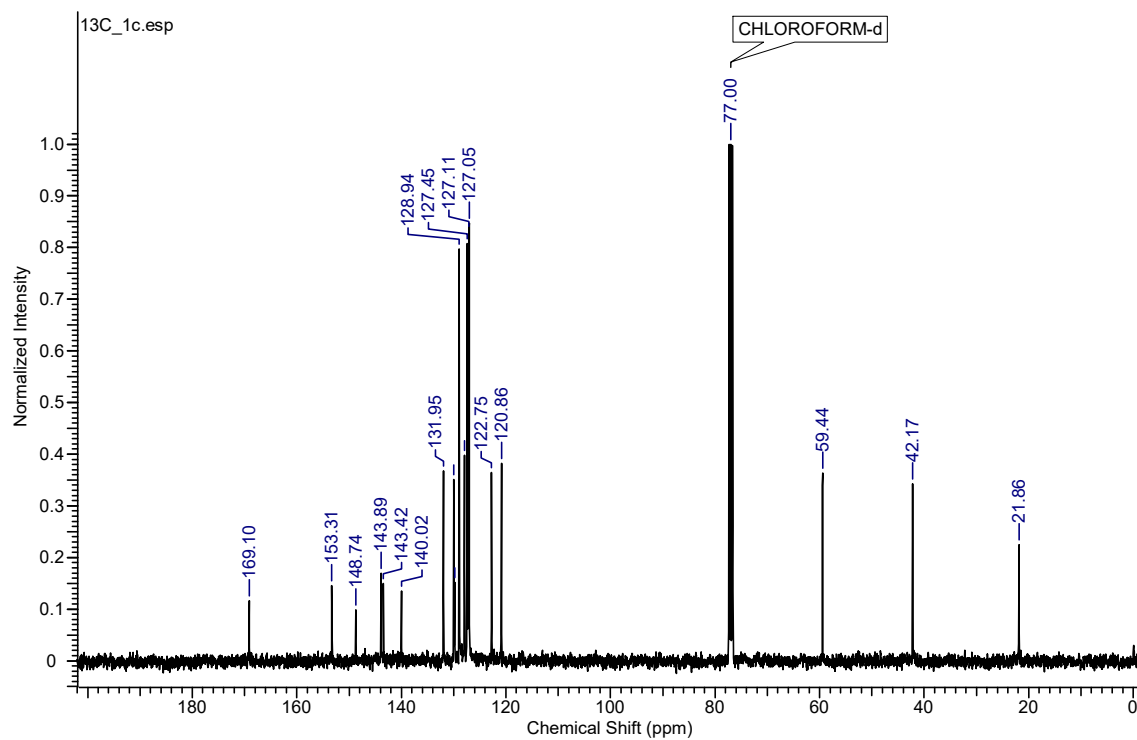

Figure 9. HR-ESI-MS of compound **1c**.

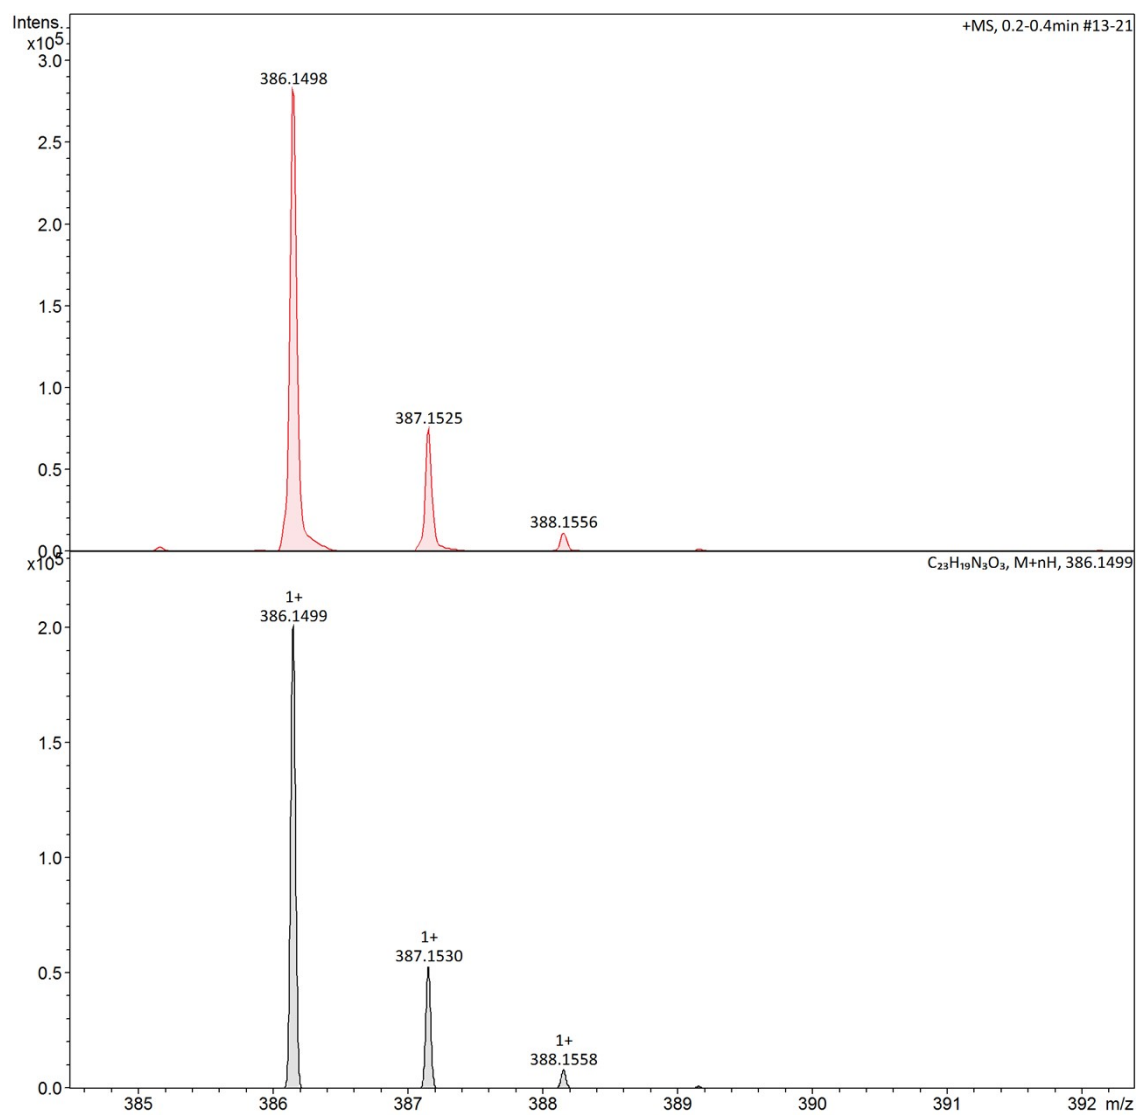



Figure 10.  $^1\text{H}$  NMR (200 MHz,  $\text{CDCl}_3$ ) of compound **1d**.

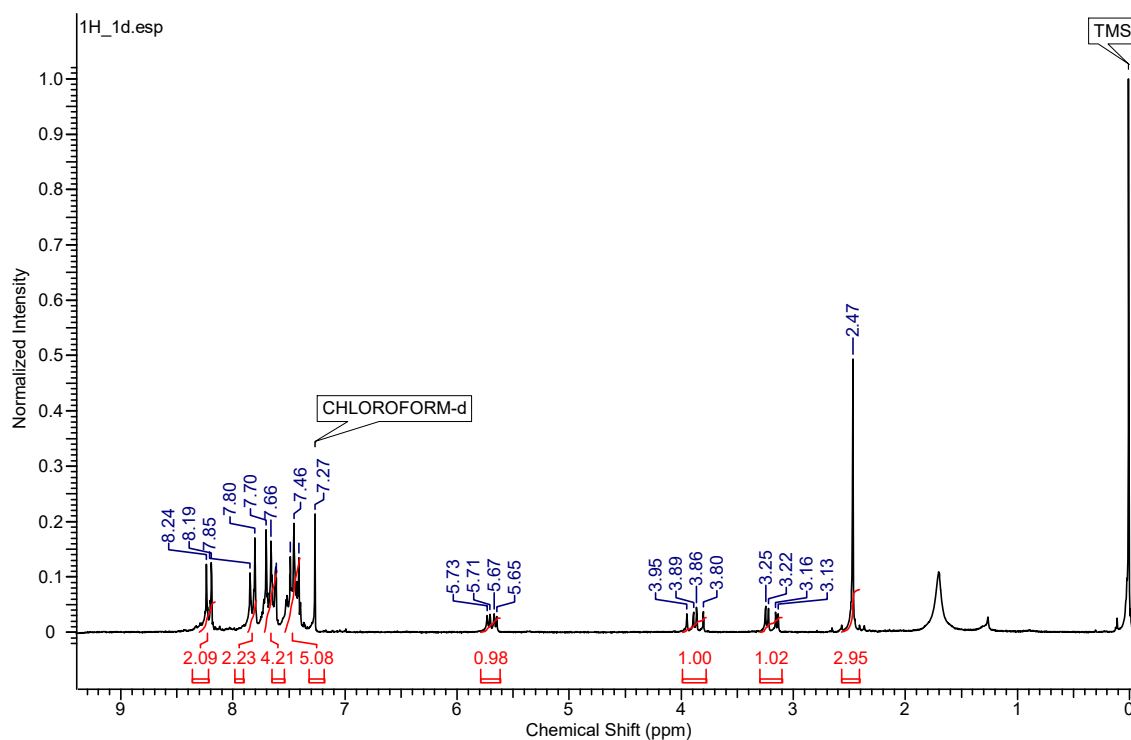

Figure 11.  $^{13}\text{C}$  NMR (100 MHz,  $\text{CDCl}_3$ ) of compound **1d**.

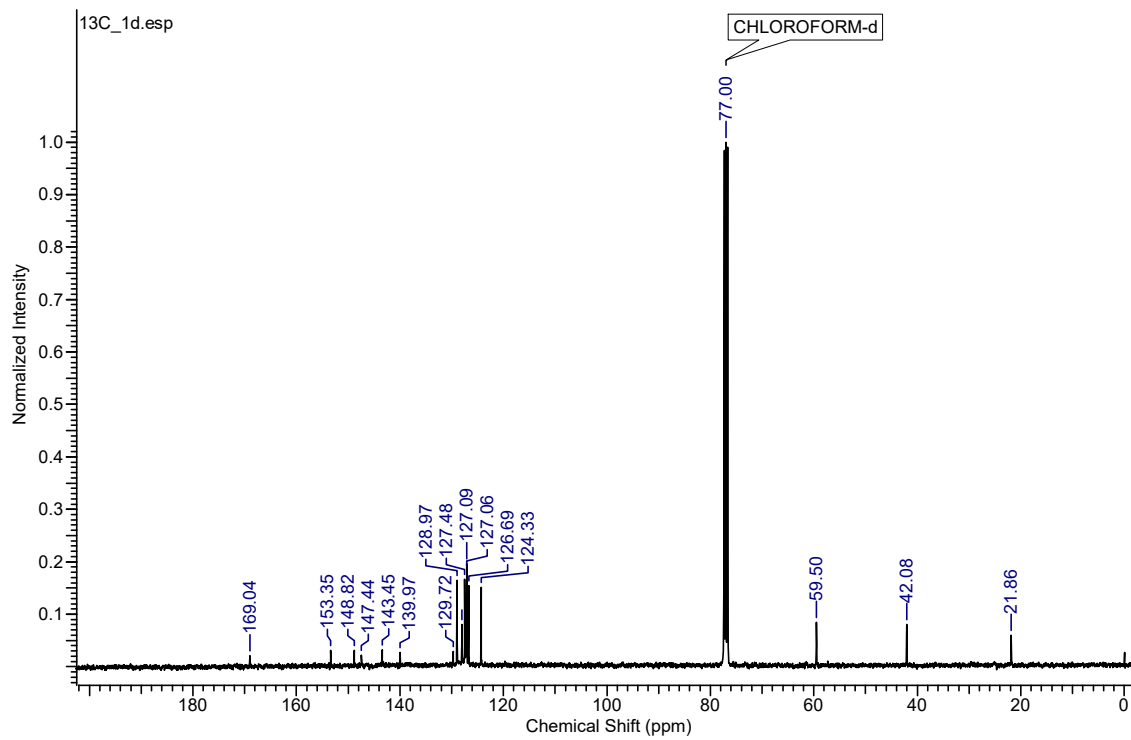

Figure 12. HR-ESI-MS of compound **1d**.

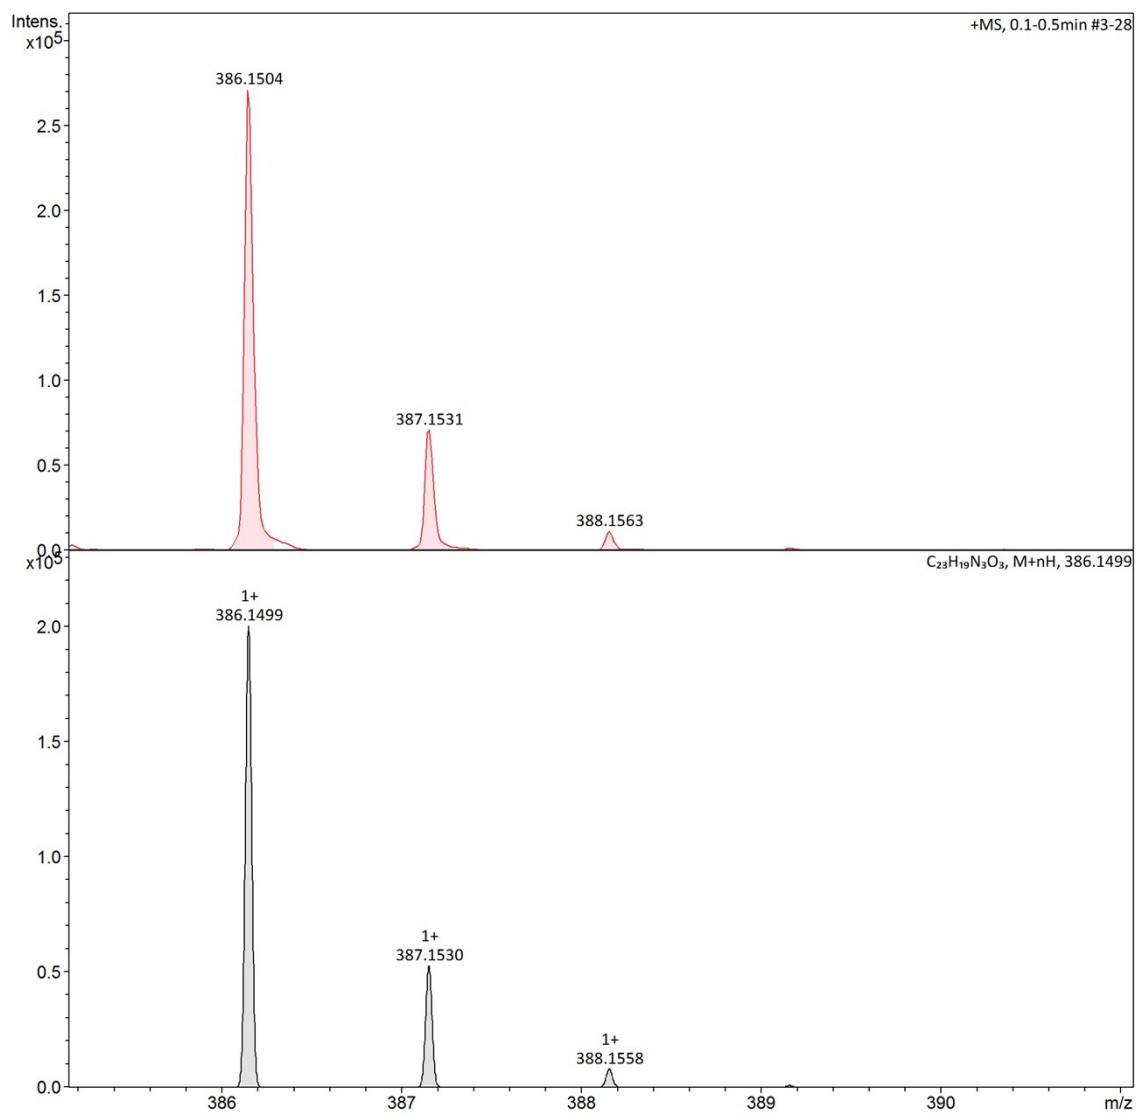

Figure 13.  $^1\text{H}$  NMR (200 MHz,  $\text{CDCl}_3$ ) of compound **1e**.

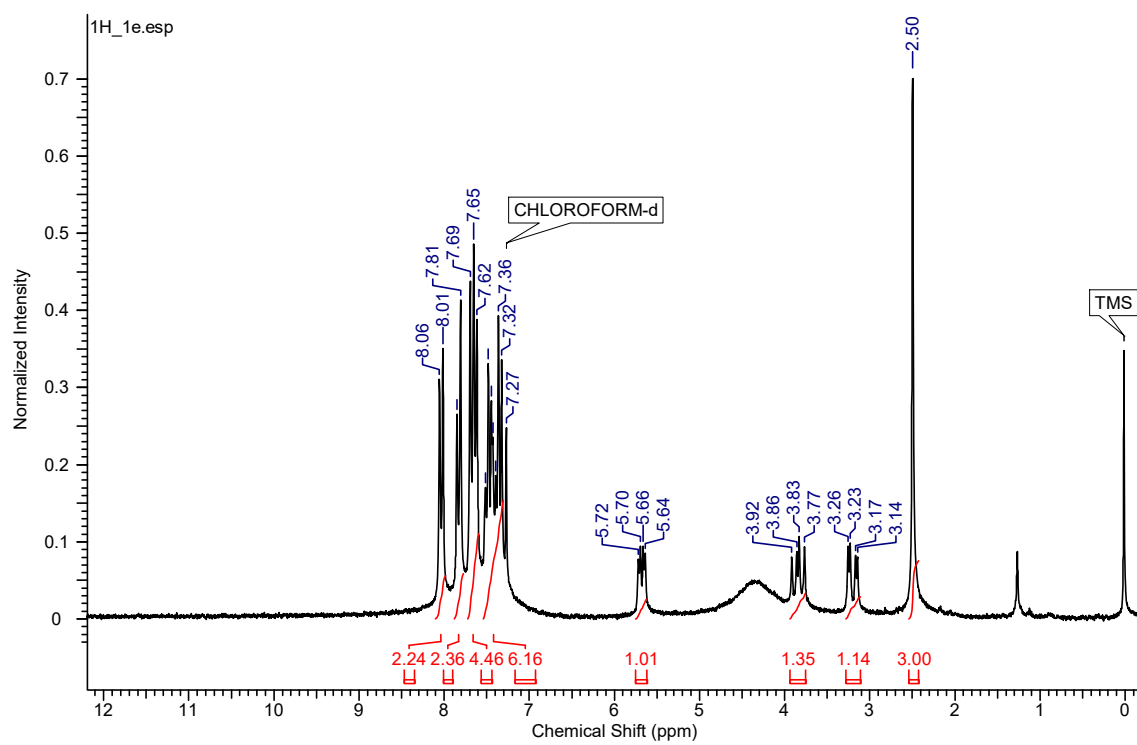

Figure 14. HR-ESI-MS of compound **1e**.

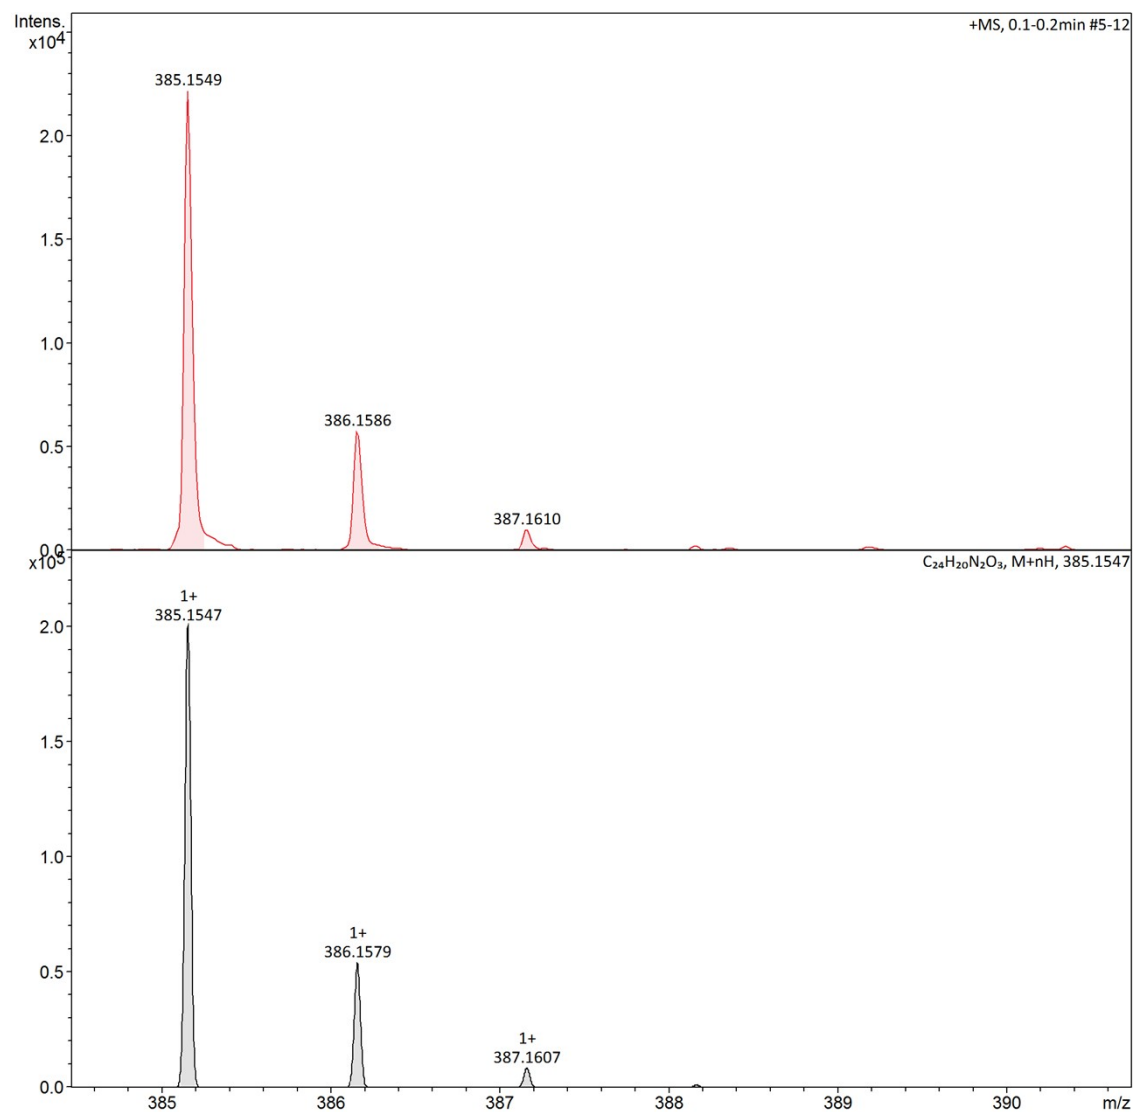

Figure 15.  $^1\text{H}$  NMR (200 MHz,  $\text{CDCl}_3$ ) of compound **1f**.

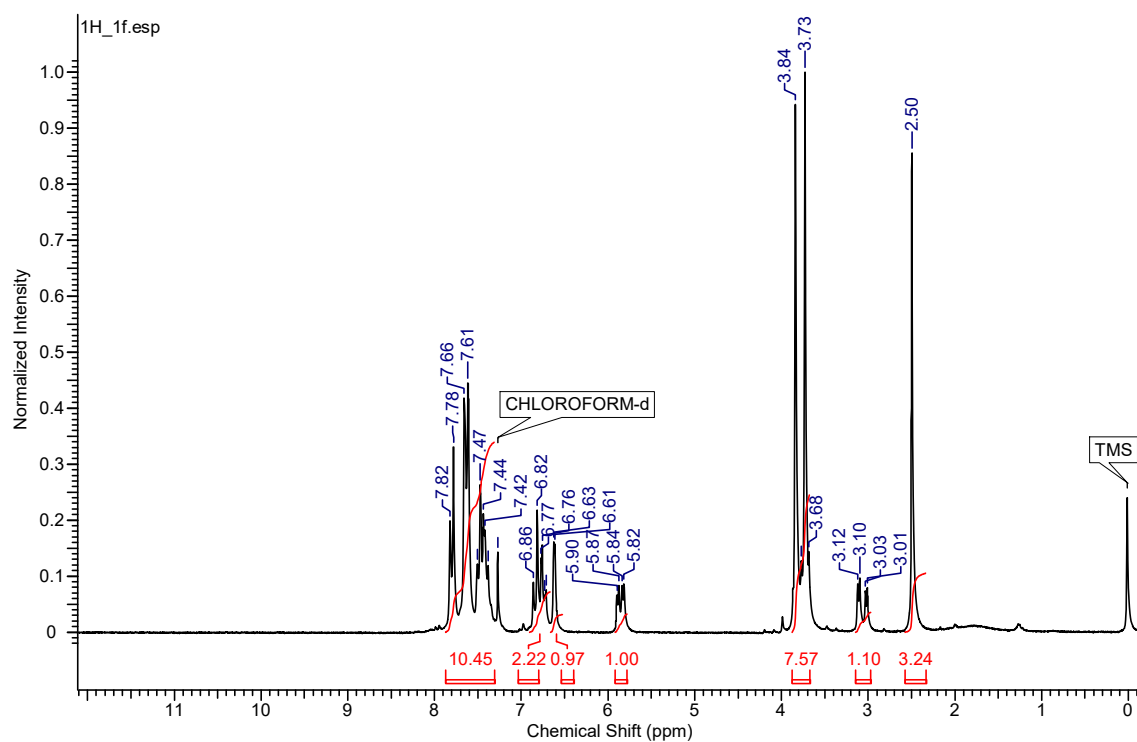

Figure 16.  $^{13}\text{C}$  NMR (50 MHz,  $\text{CDCl}_3$ ) of compound **1f**.

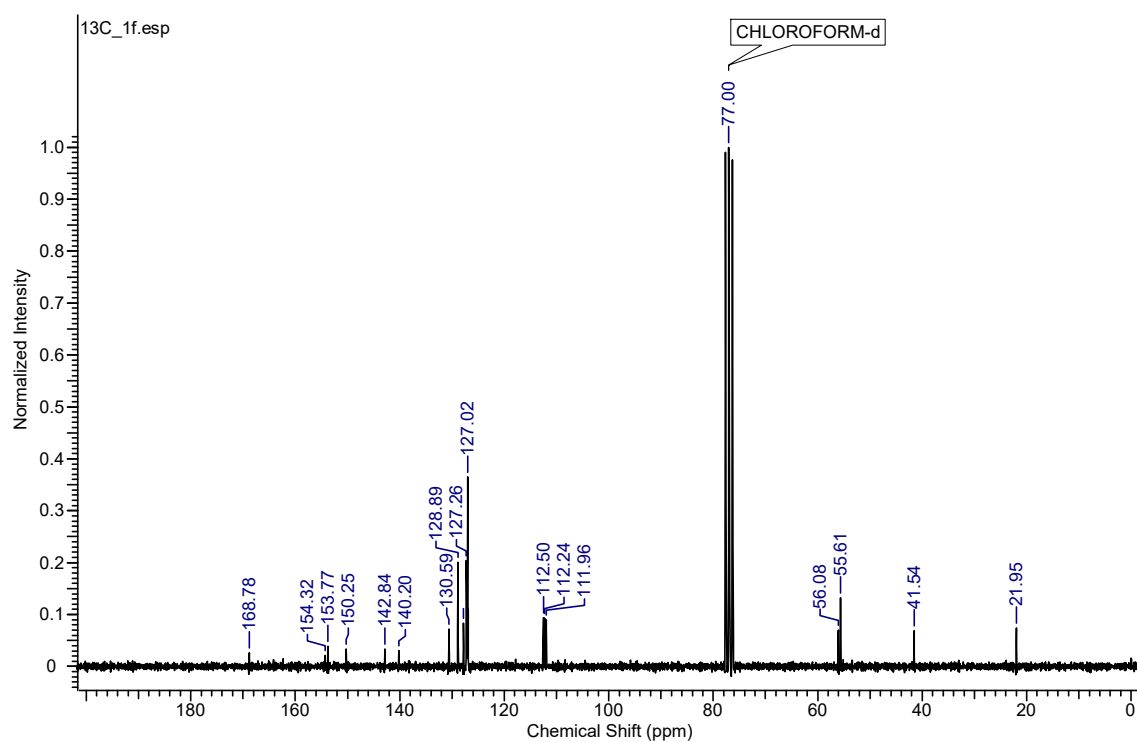

Figure 17. HR-ESI-MS of compound **1f**.

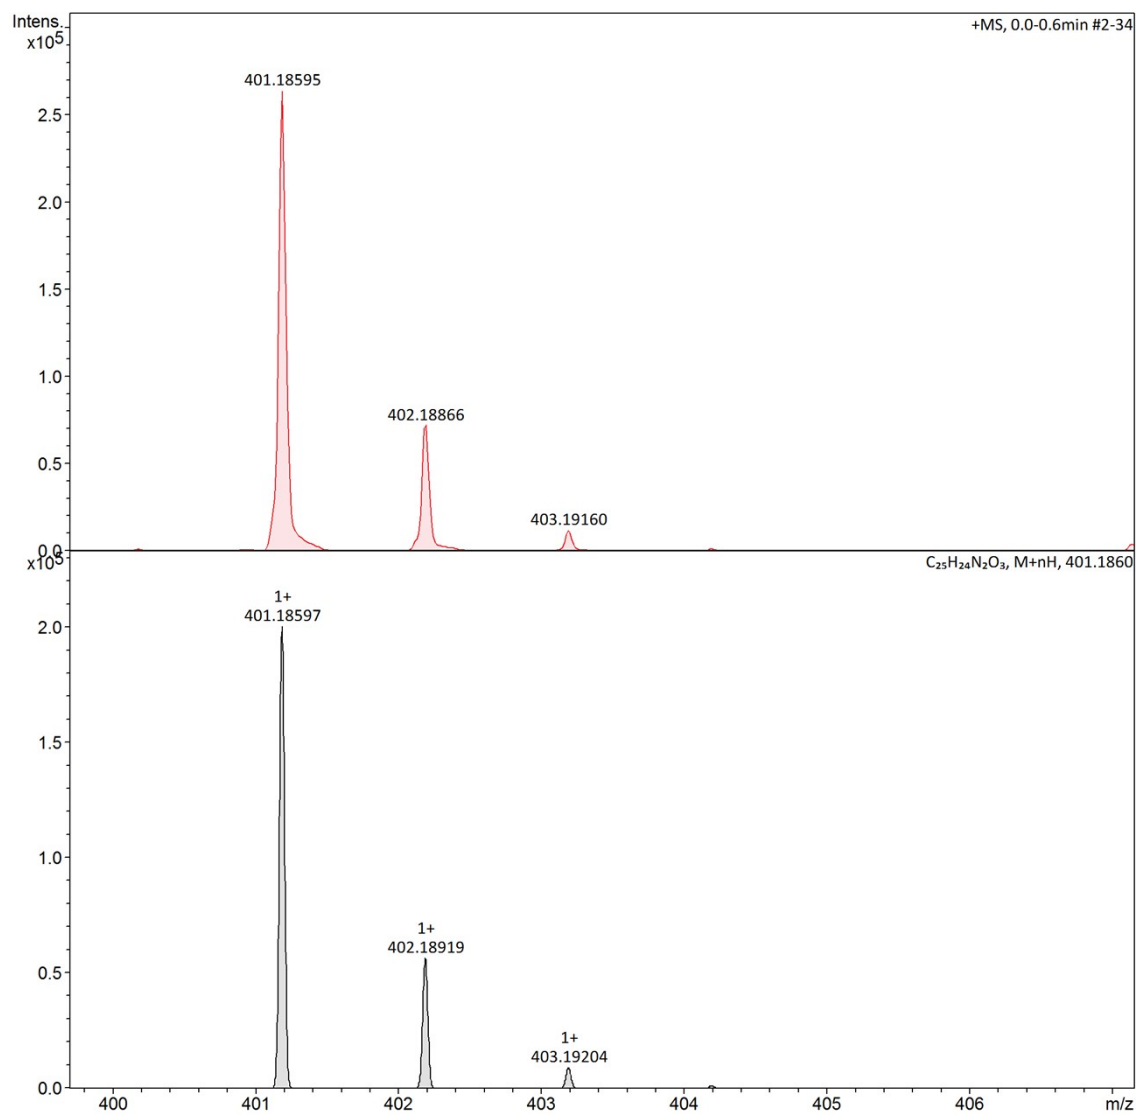

Figure 18.  $^1\text{H}$  NMR (200 MHz,  $\text{CDCl}_3$ ) of compound **1g**.

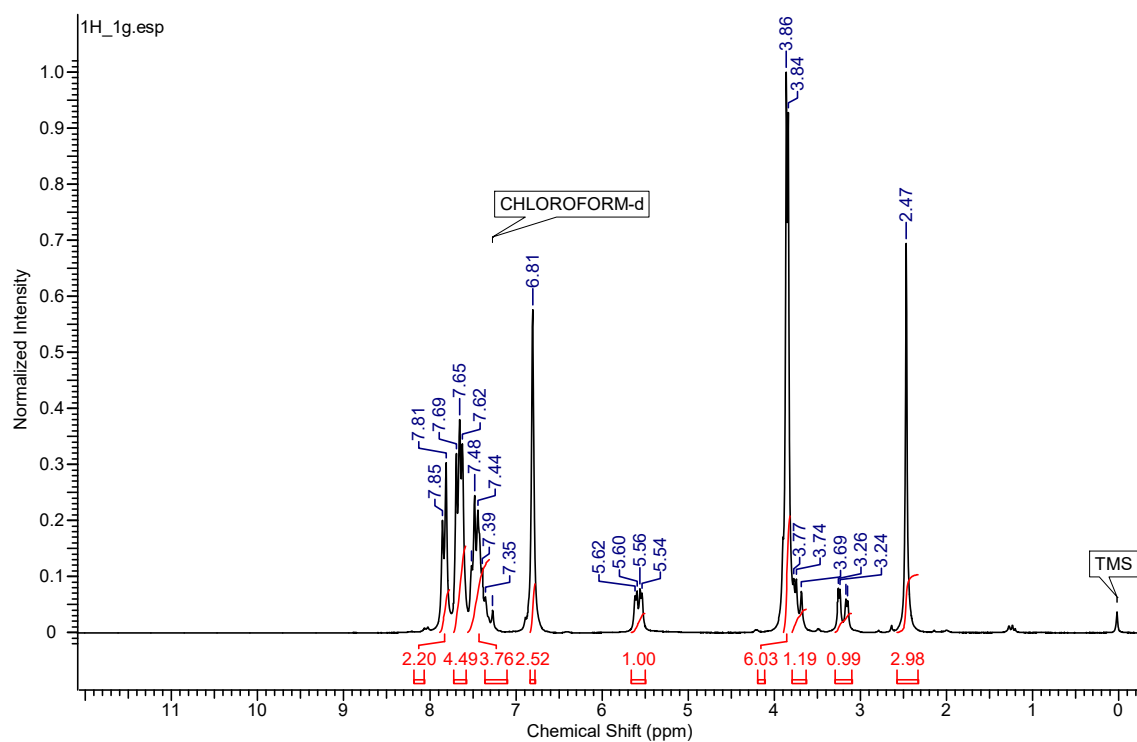

Figure 19.  $^{13}\text{C}$  NMR (50 MHz,  $\text{CDCl}_3$ ) of compound **1g**.

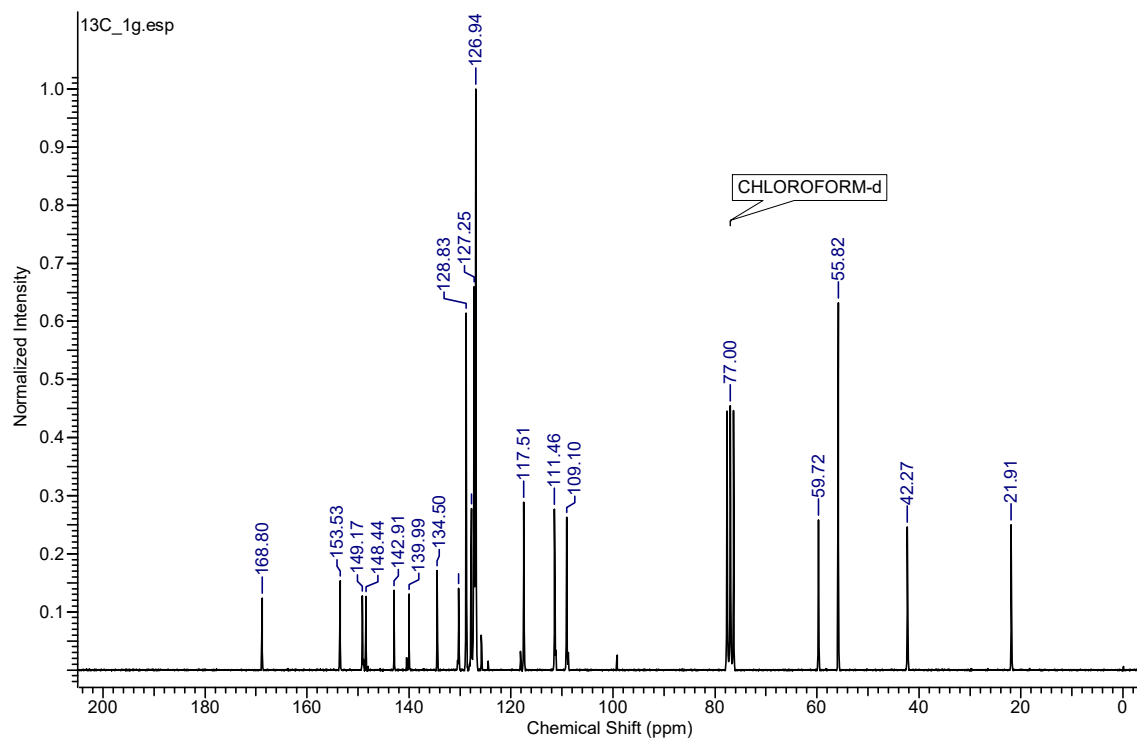

Figure 20. HR-ESI-MS of compound **1g**.

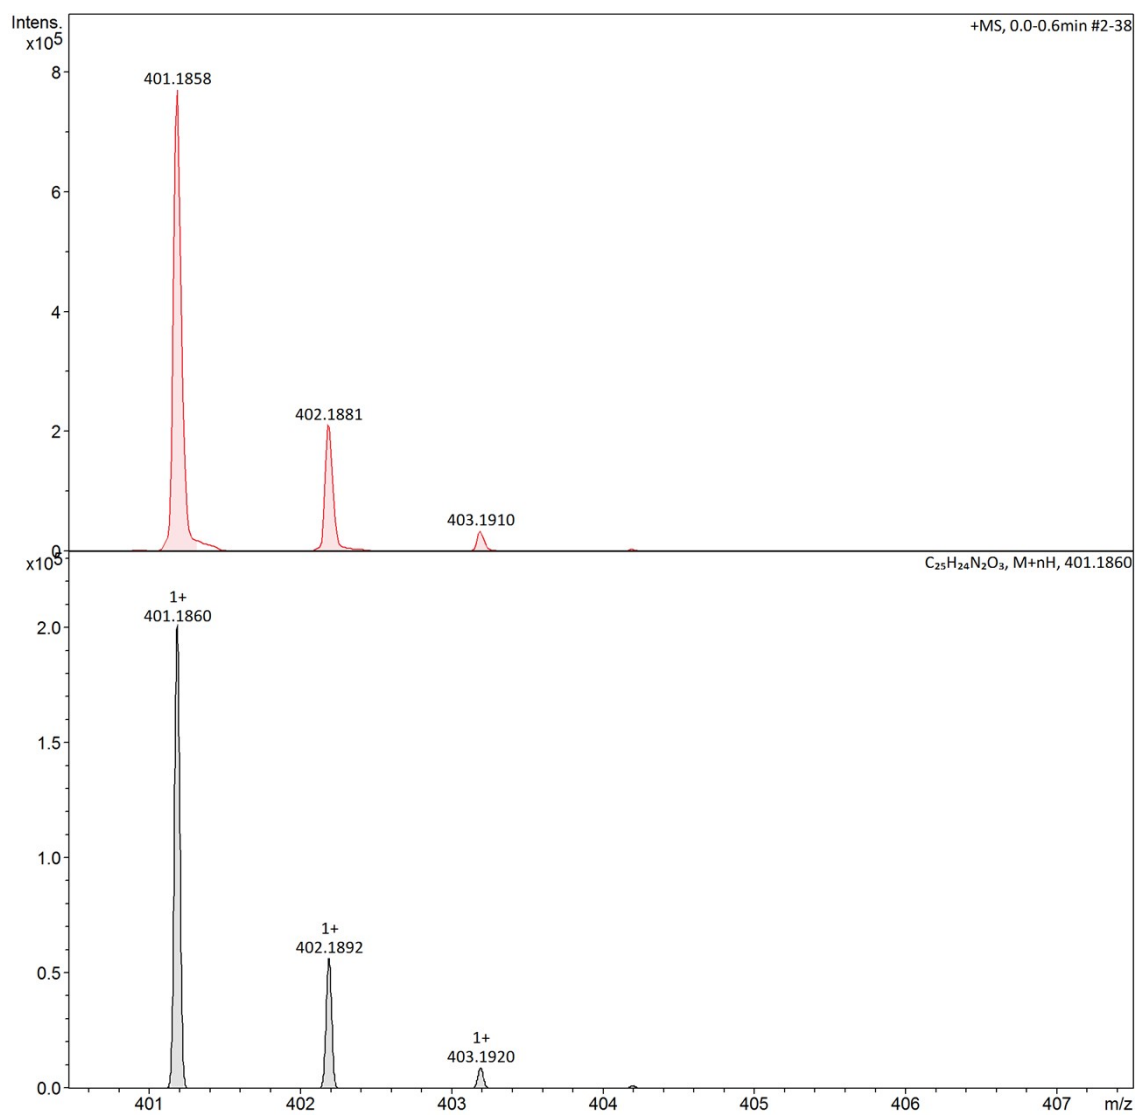



Figure 21.  $^1\text{H}$  NMR (200 MHz,  $\text{CDCl}_3$ ) of compound **1h**.

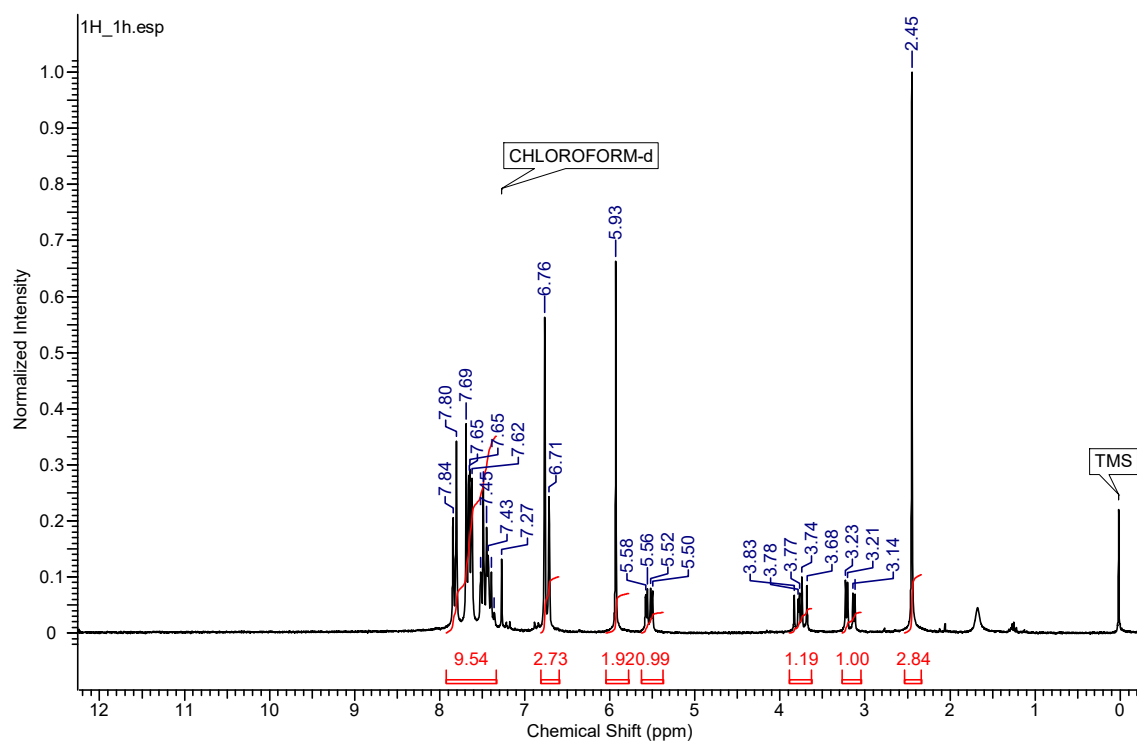

Figure 22.  $^{13}\text{C}$  NMR (50 MHz,  $\text{CDCl}_3$ ) of compound **1h**.

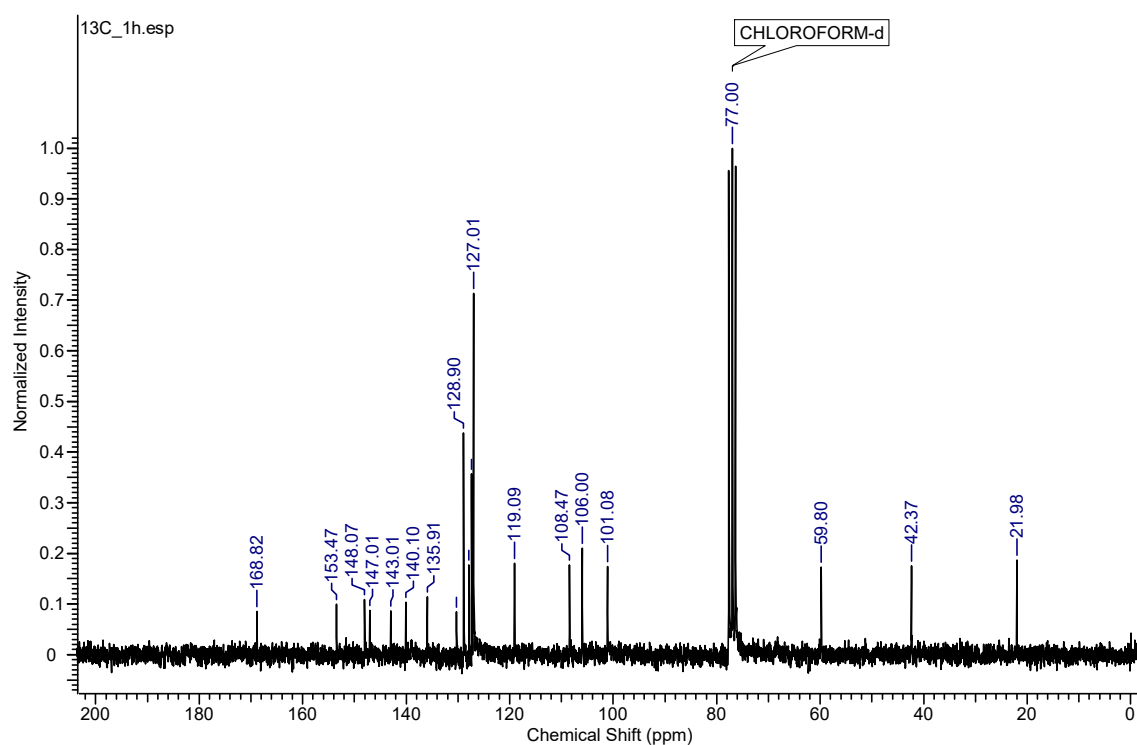

Figure 23. HR-ESI-MS of compound **1h**.

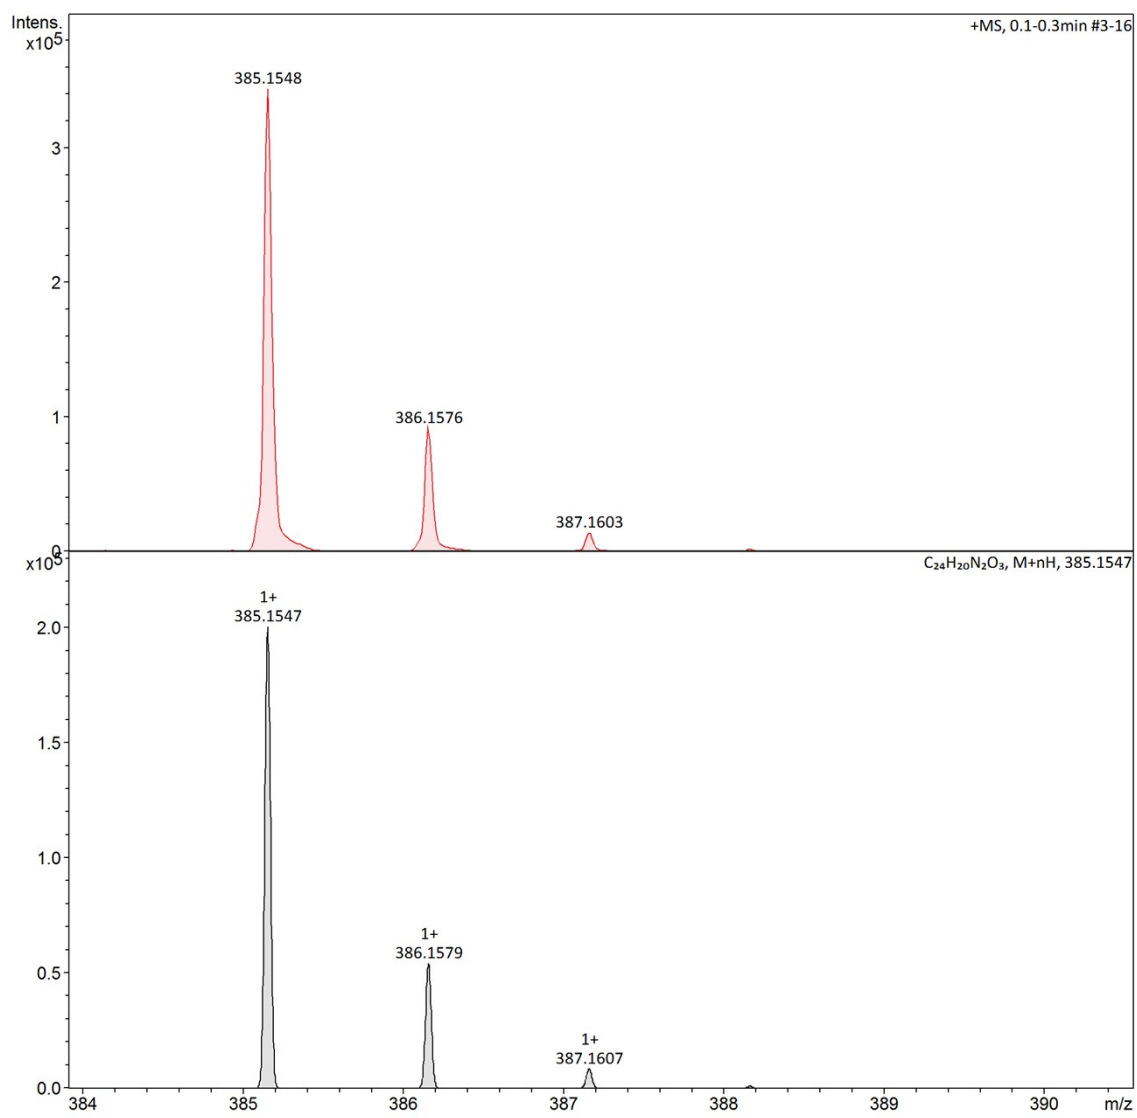

Figure 24.  $^1\text{H}$  NMR (200 MHz,  $\text{CDCl}_3$ ) of compound **1i**.

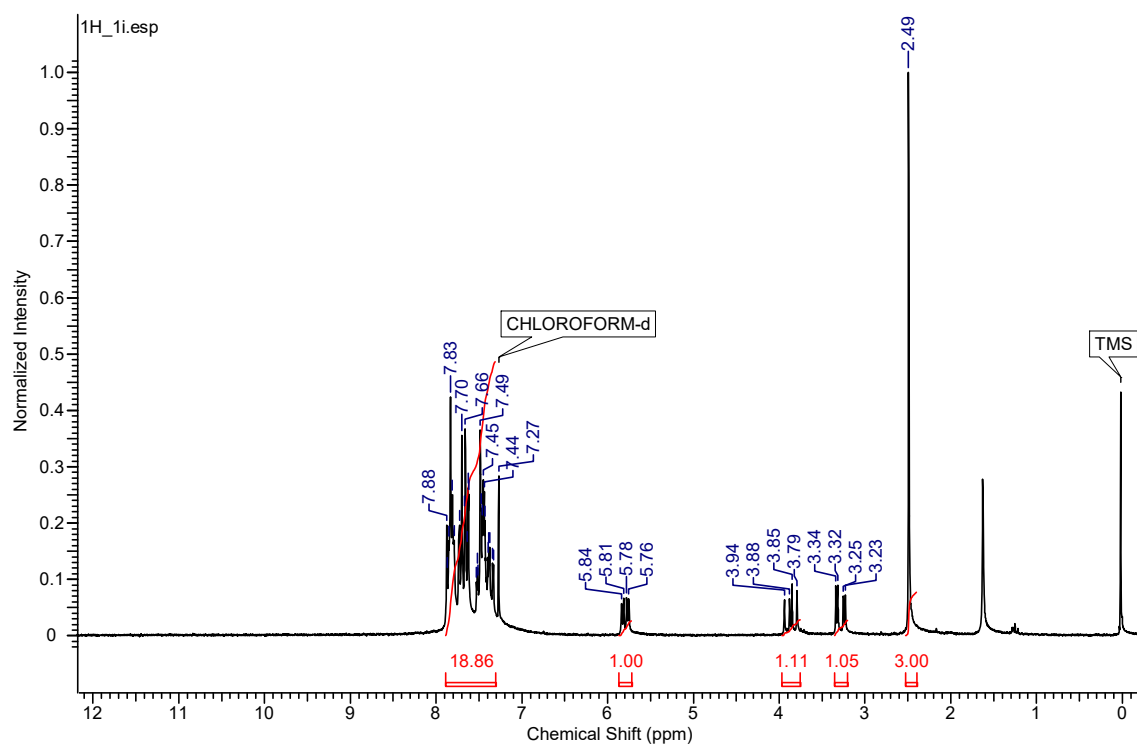

Figure 25.  $^{13}\text{C}$  NMR (50 MHz,  $\text{CDCl}_3$ ) of compound **1i**.

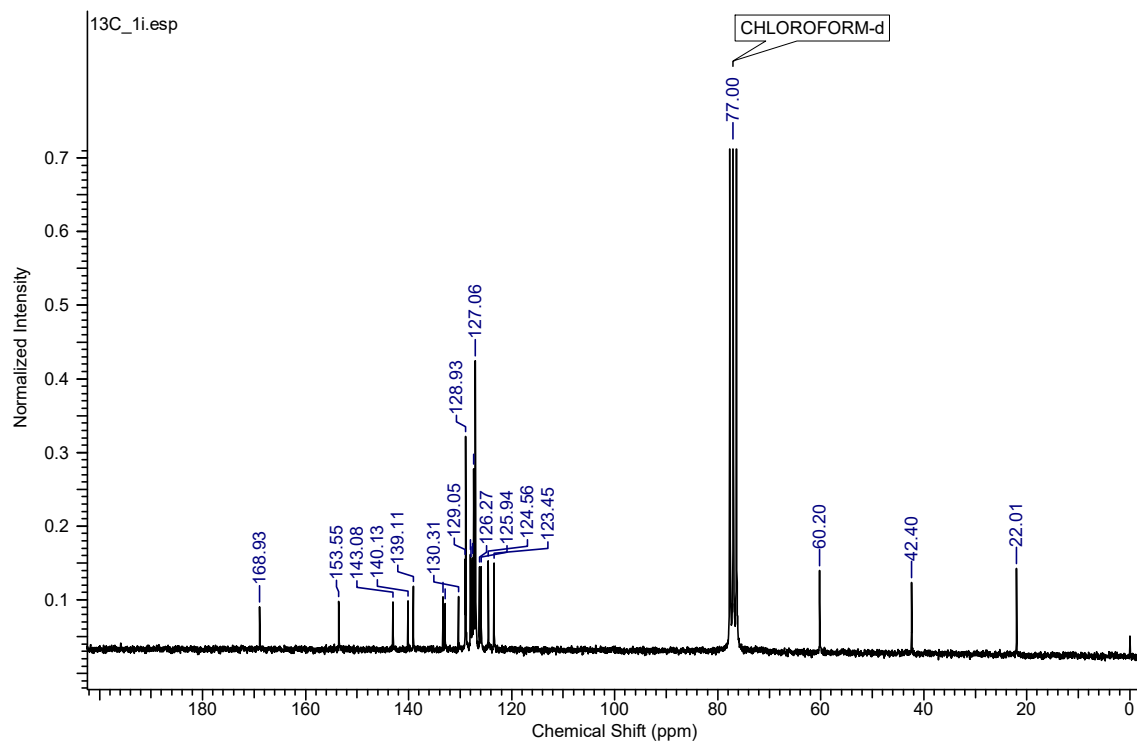

Figure 26. HR-ESI-MS of compound **1i**.

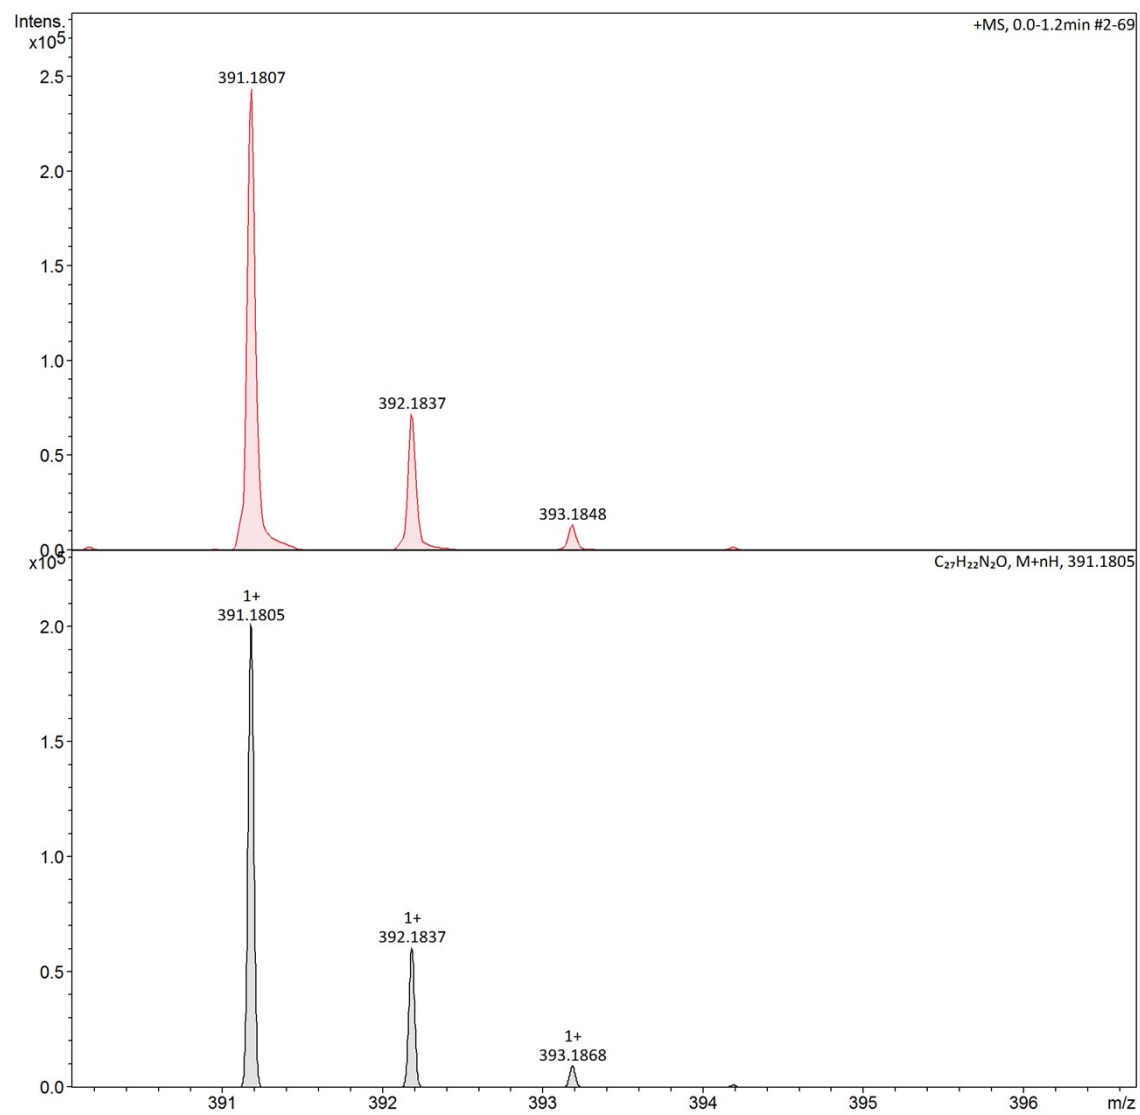

Figure 27.  $^1\text{H}$  NMR (200 MHz,  $\text{CDCl}_3$ ) of compound **2a**.

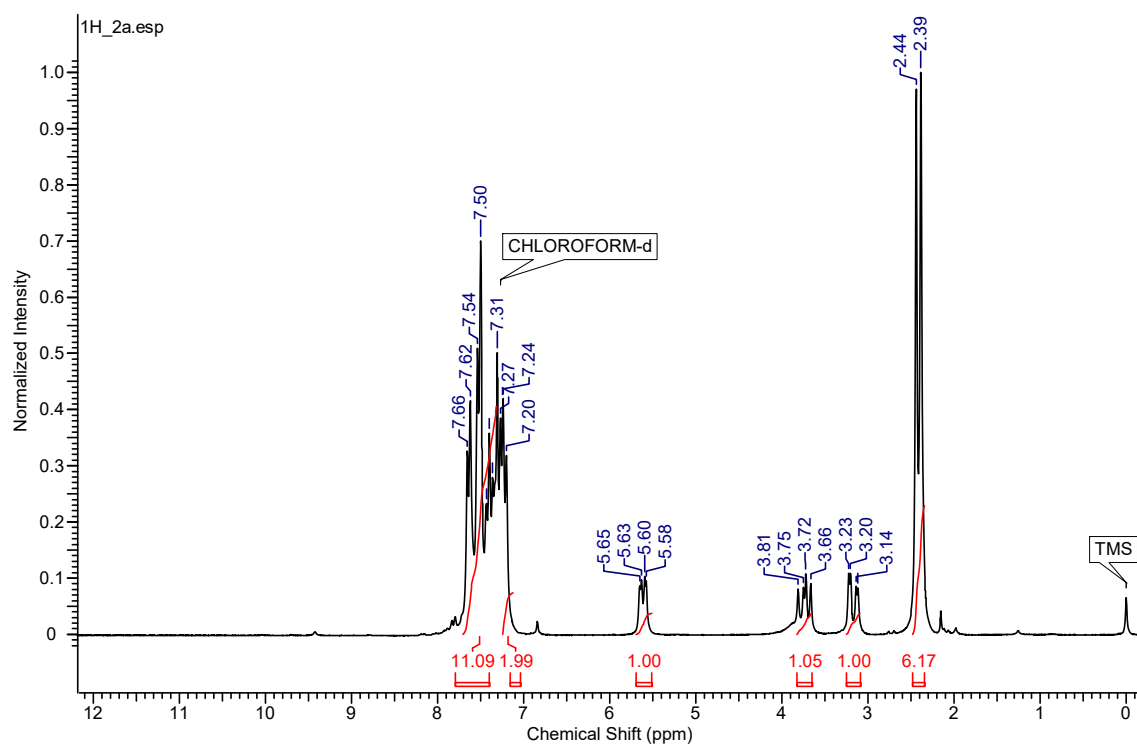

Figure 28.  $^{13}\text{C}$  NMR (50 MHz,  $\text{CDCl}_3$ ) of compound **2a**.

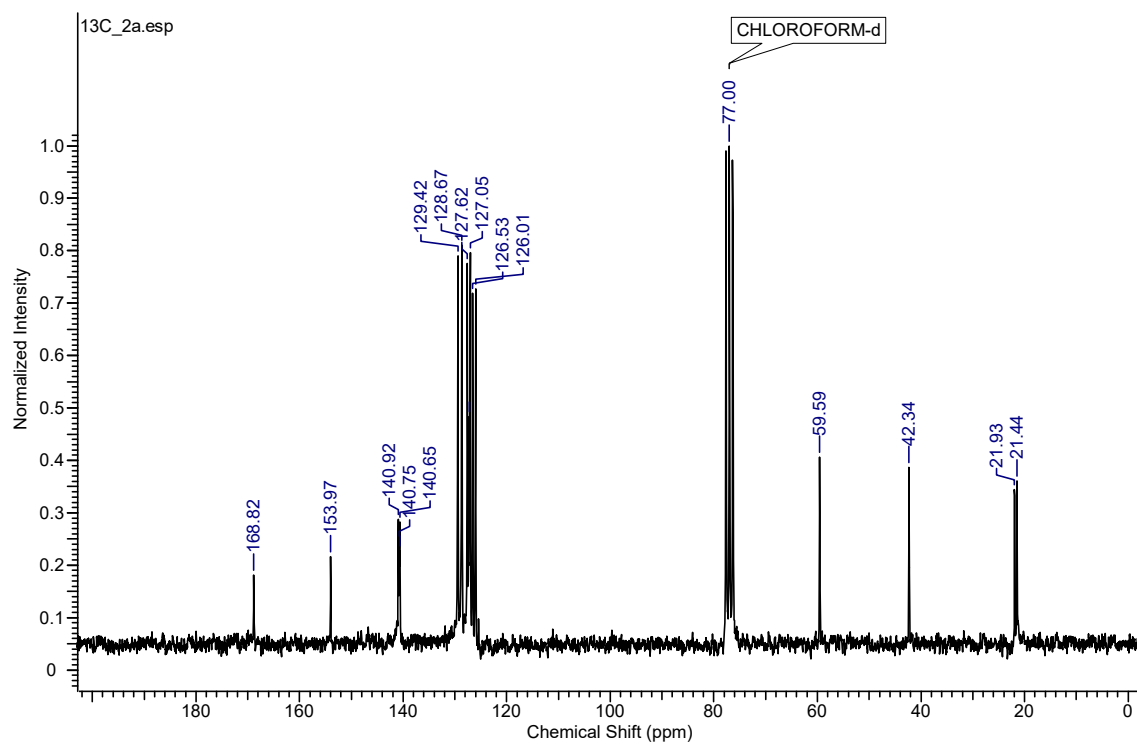

Figure 29. HR-ESI-MS of compound **2a**.

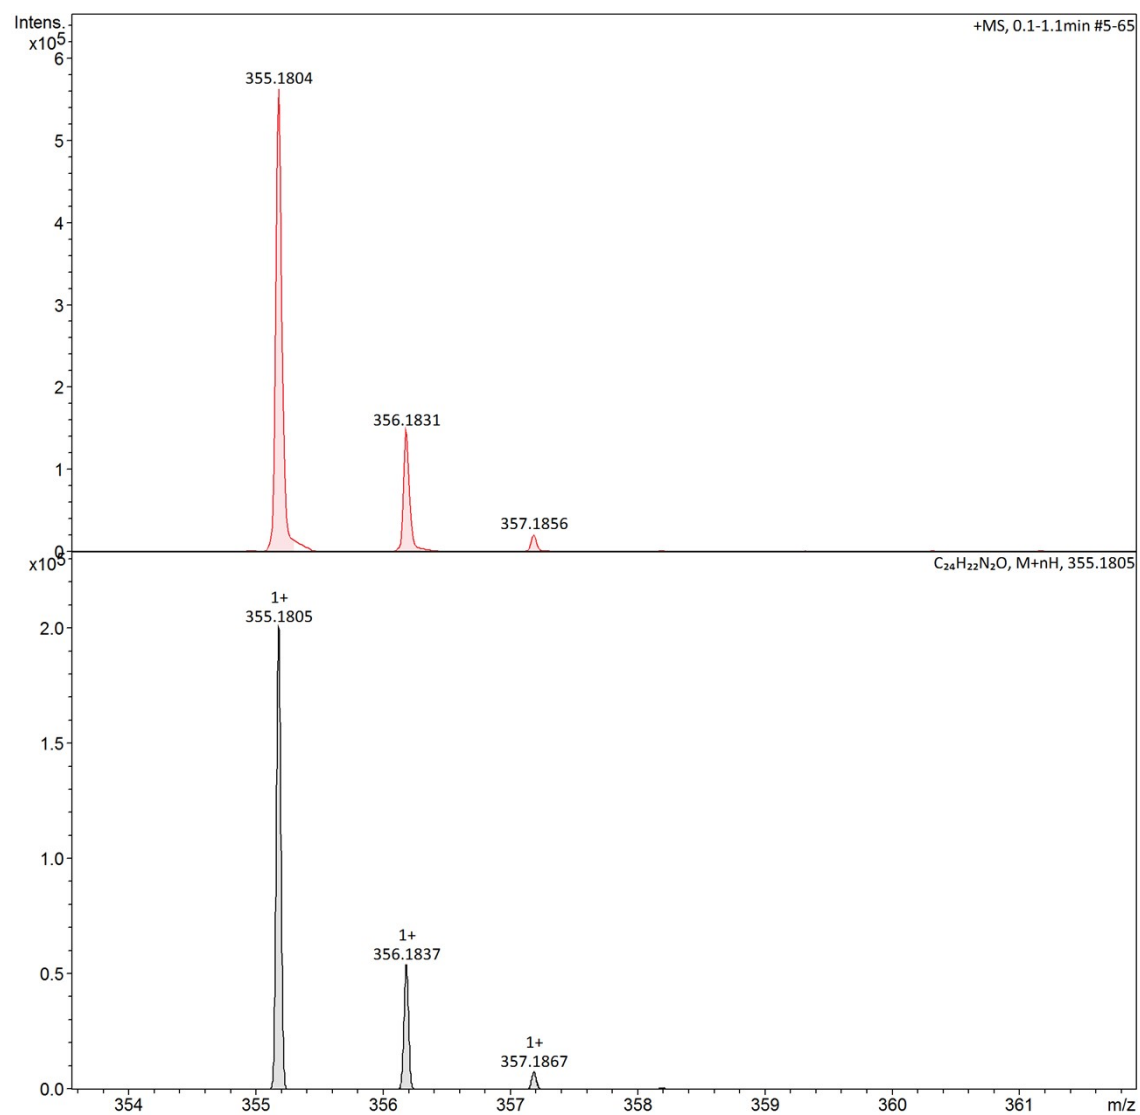

Figure 30.  $^1\text{H}$  NMR (400 MHz,  $\text{CDCl}_3$ ) of compound **2b**.

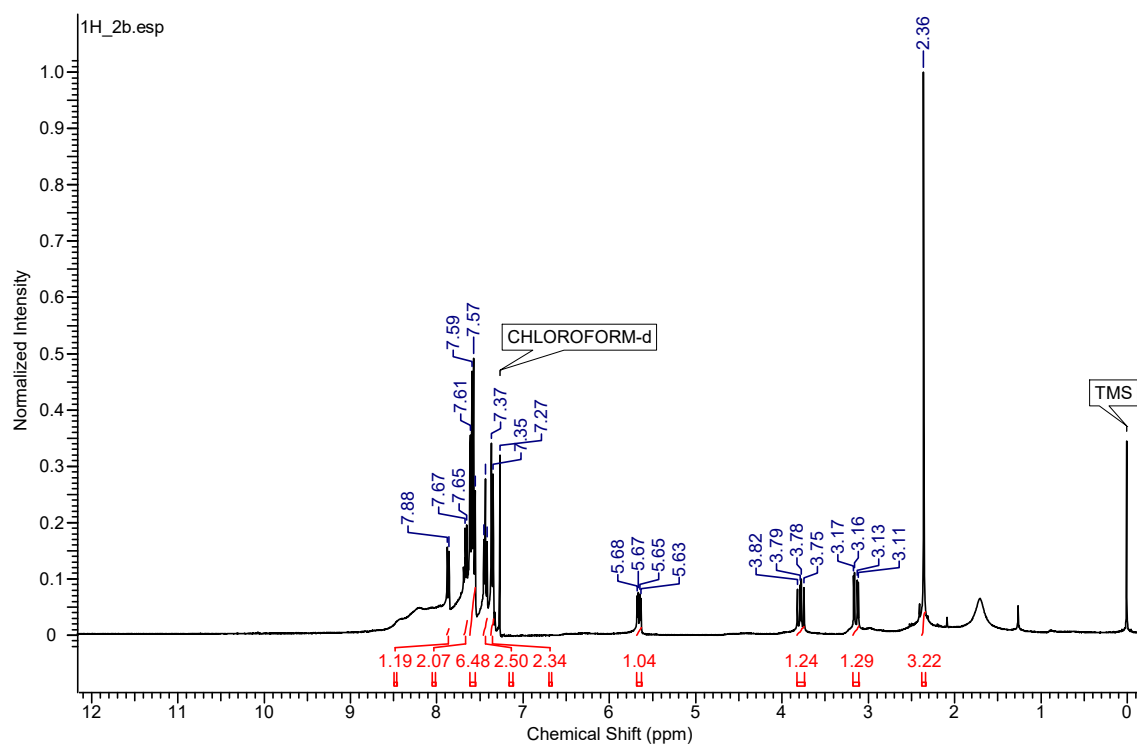

Figure 31.  $^{13}\text{C}$  NMR (100 MHz,  $\text{CDCl}_3$ ) of compound **2b**.

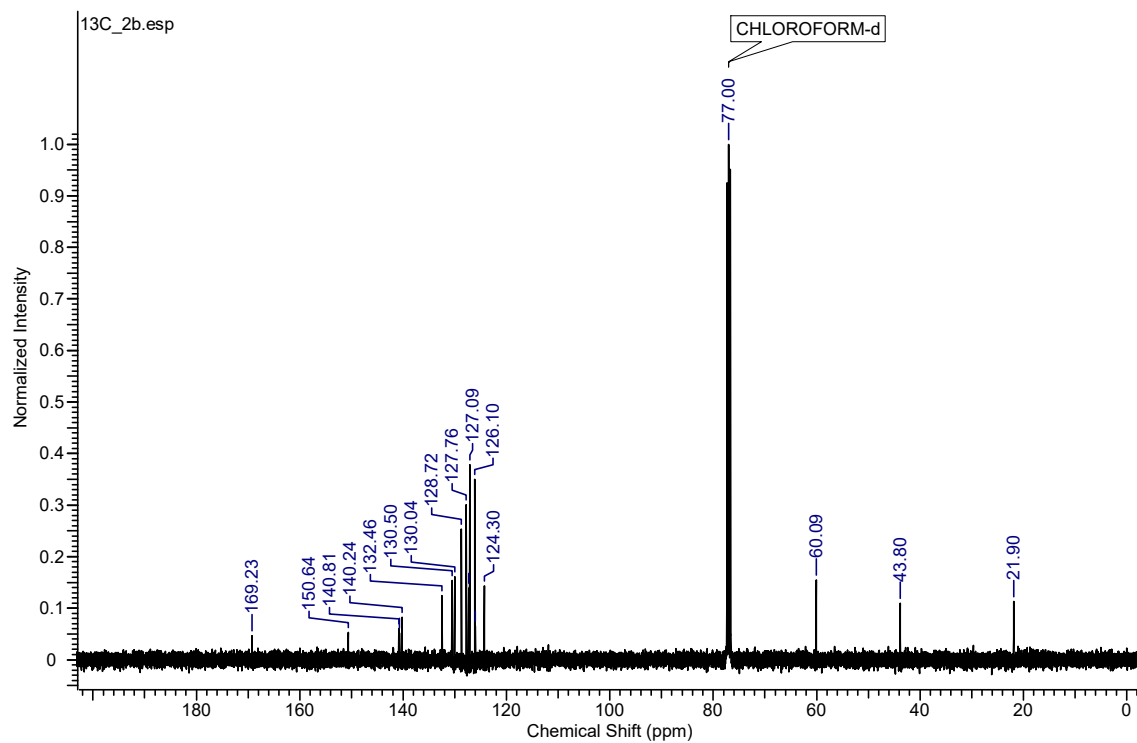

Figure 32. HR-ESI-MS of compound **2b**.

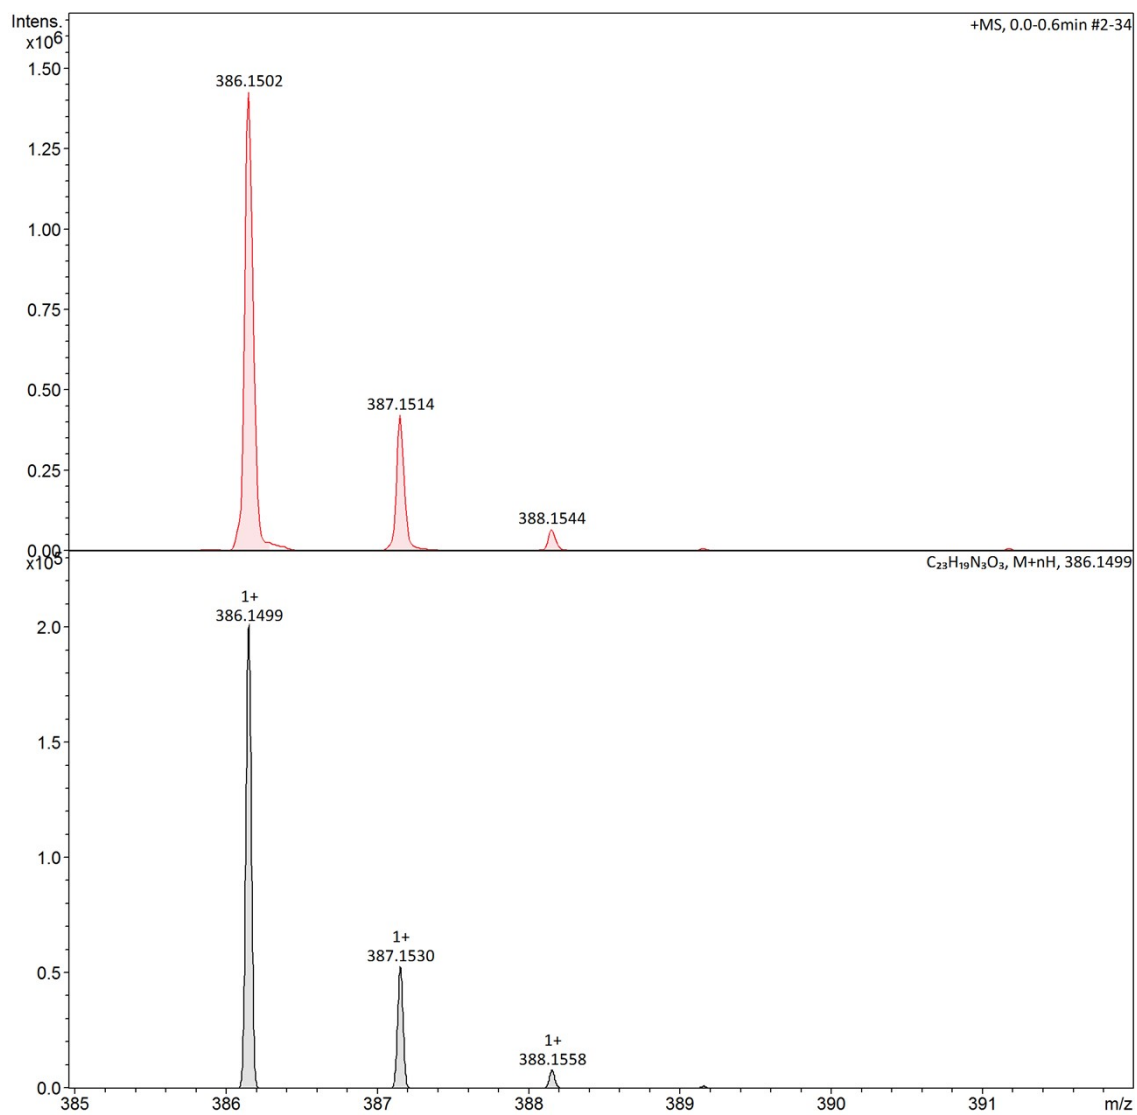



Figure 33.  $^1\text{H}$  NMR (400 MHz,  $\text{CDCl}_3$ ) of compound **2c**.

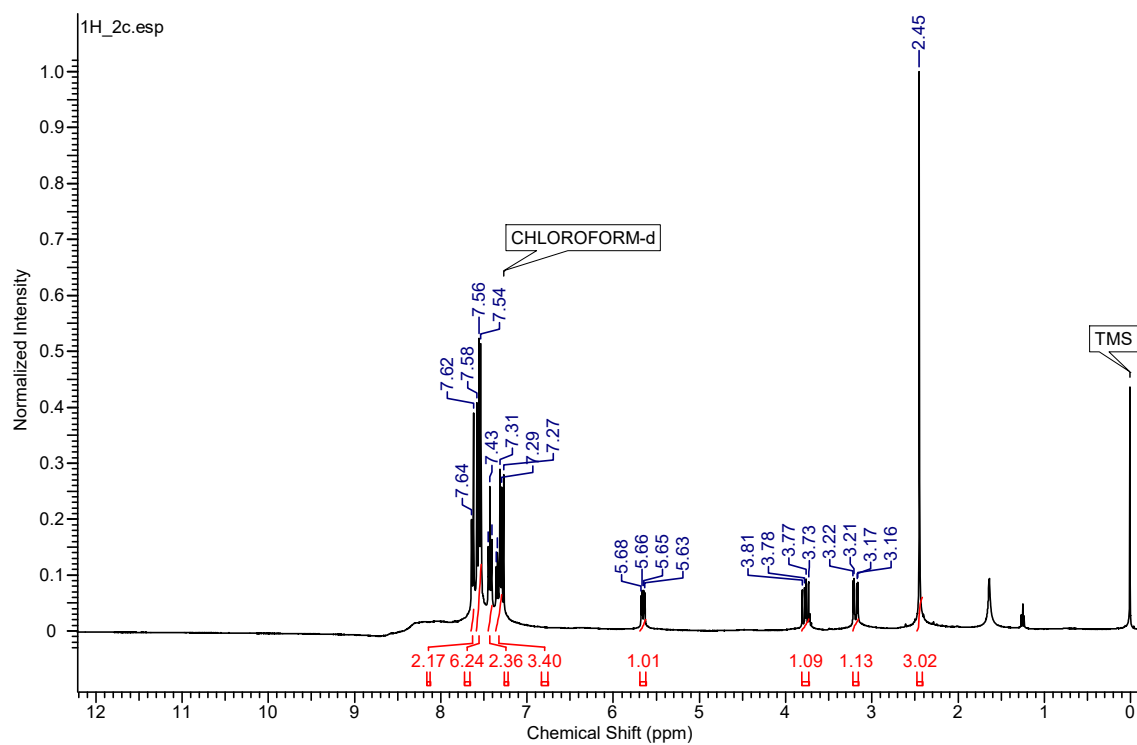

Figure 34.  $^{13}\text{C}$  NMR (100 MHz,  $\text{CDCl}_3$ ) of compound **2c**.

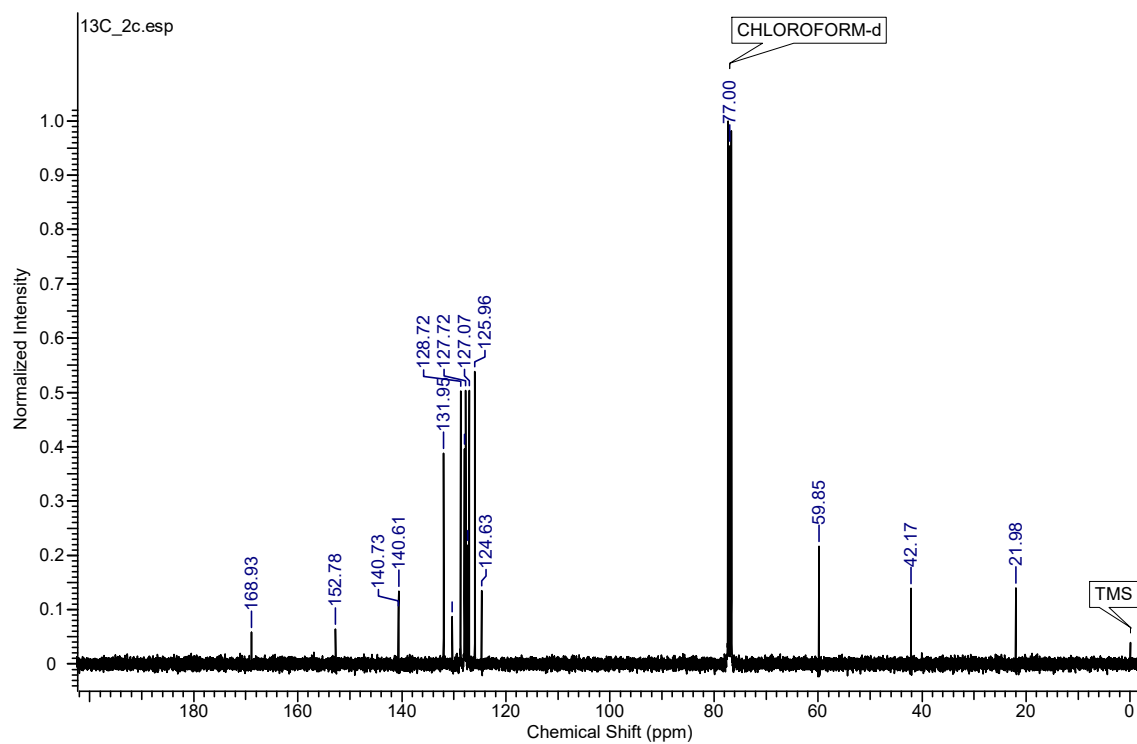

Figure 35. HR-ESI-MS of compound 2c.

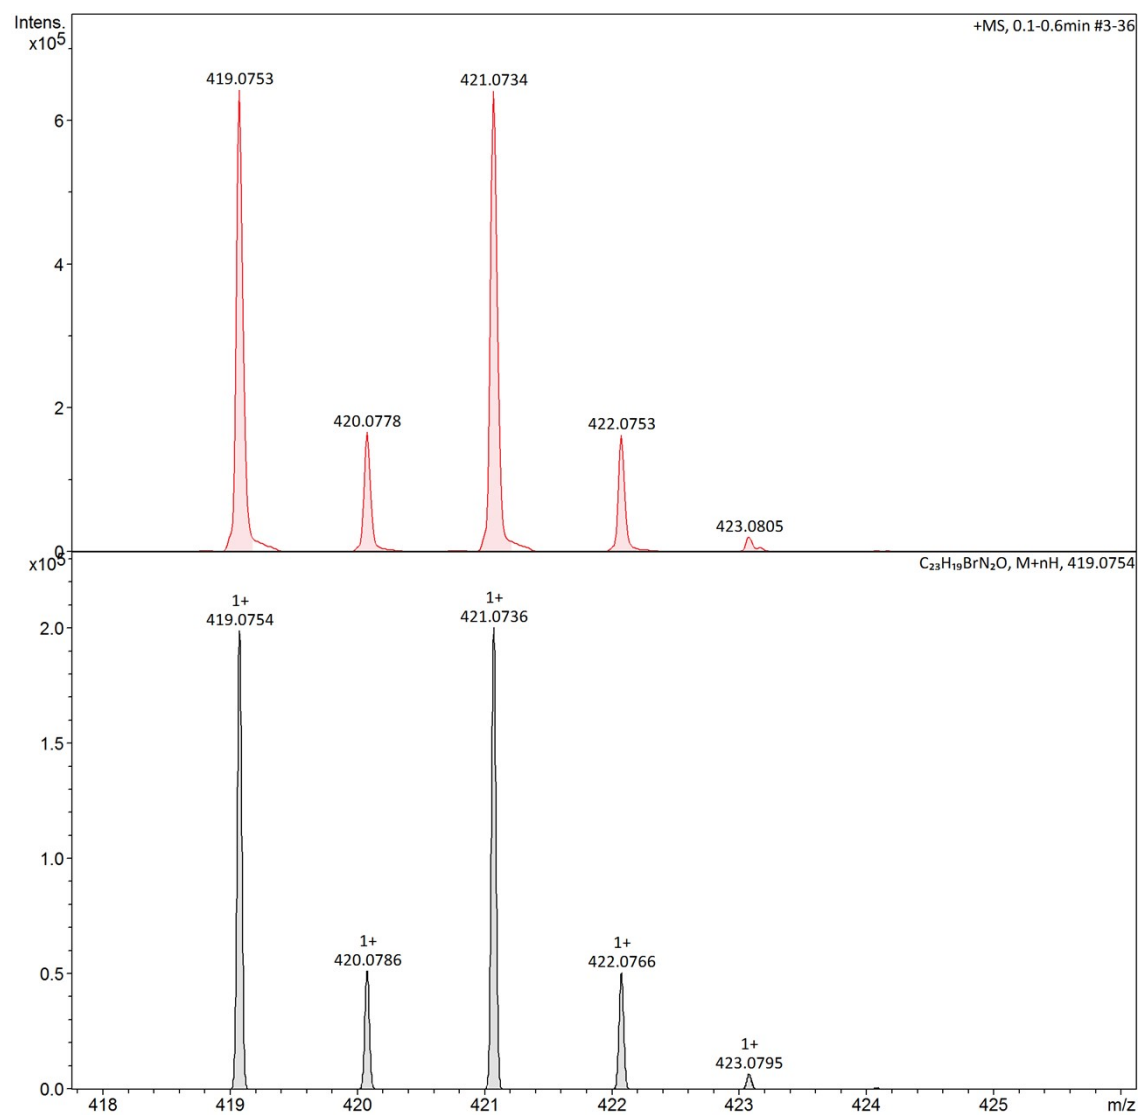

Figure 36.  $^1\text{H}$  NMR (200 MHz,  $\text{CDCl}_3$ ) of compound **2d**.

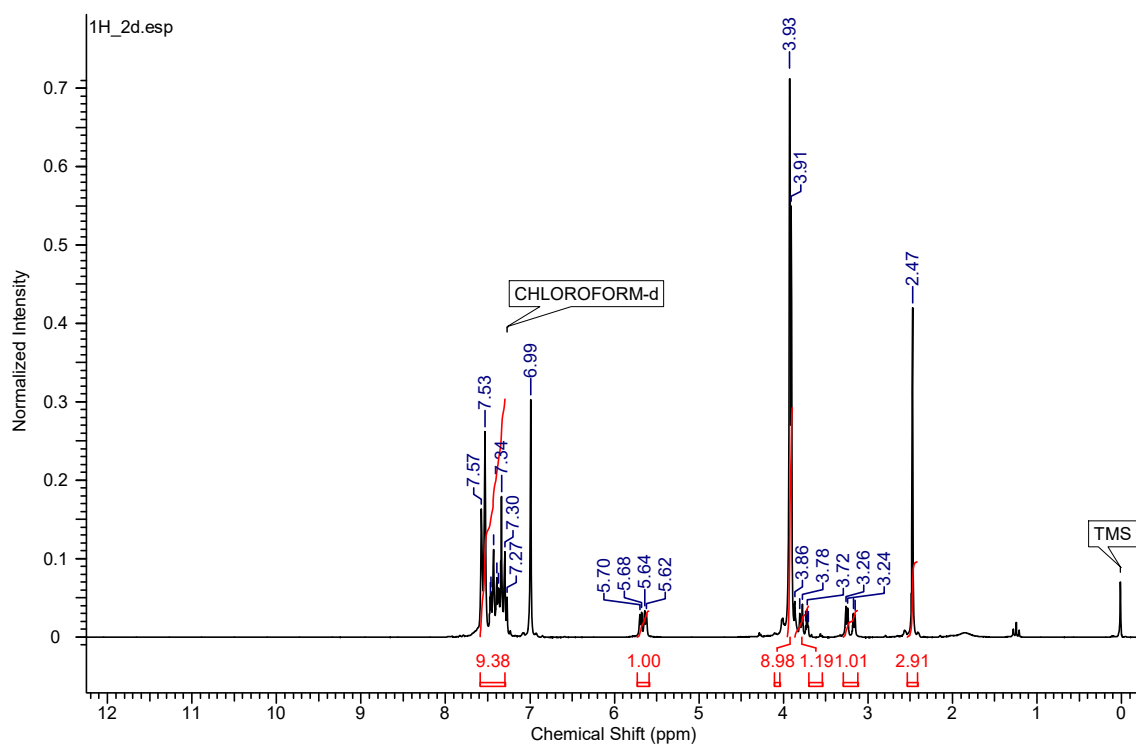

Figure 37.  $^{13}\text{C}$  NMR (50 MHz,  $\text{CDCl}_3$ ) of compound **2d**.

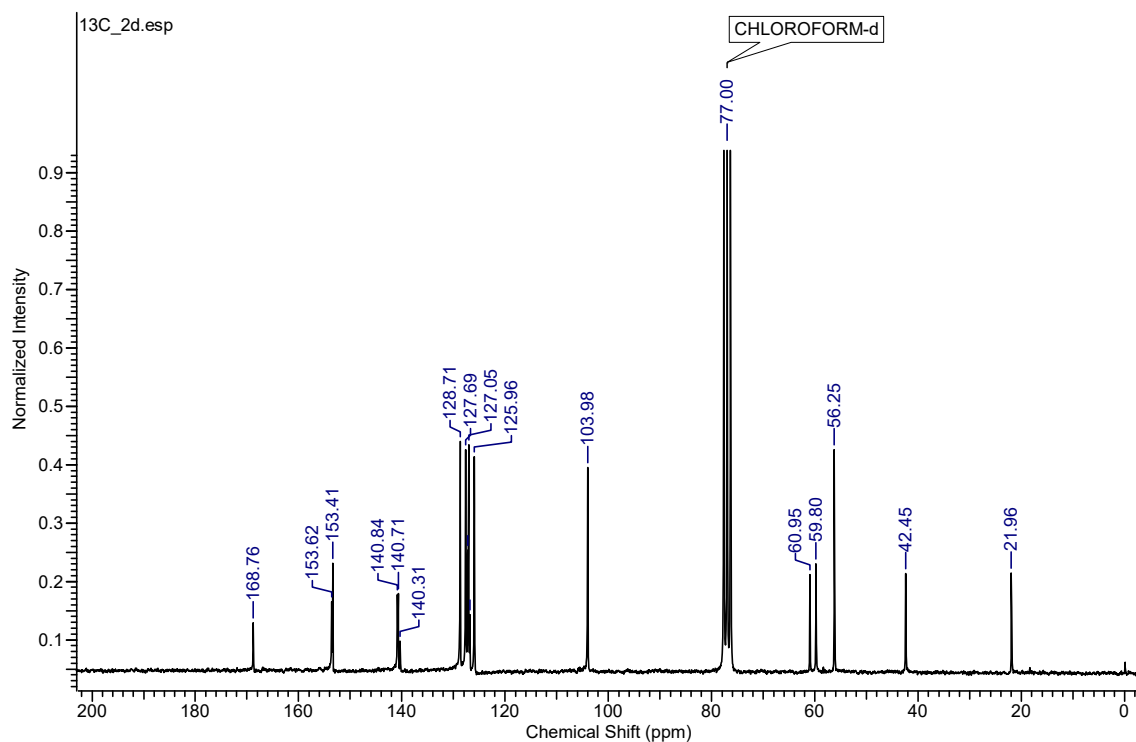

Figure 38. HR-ESI-MS of compound **2d**.

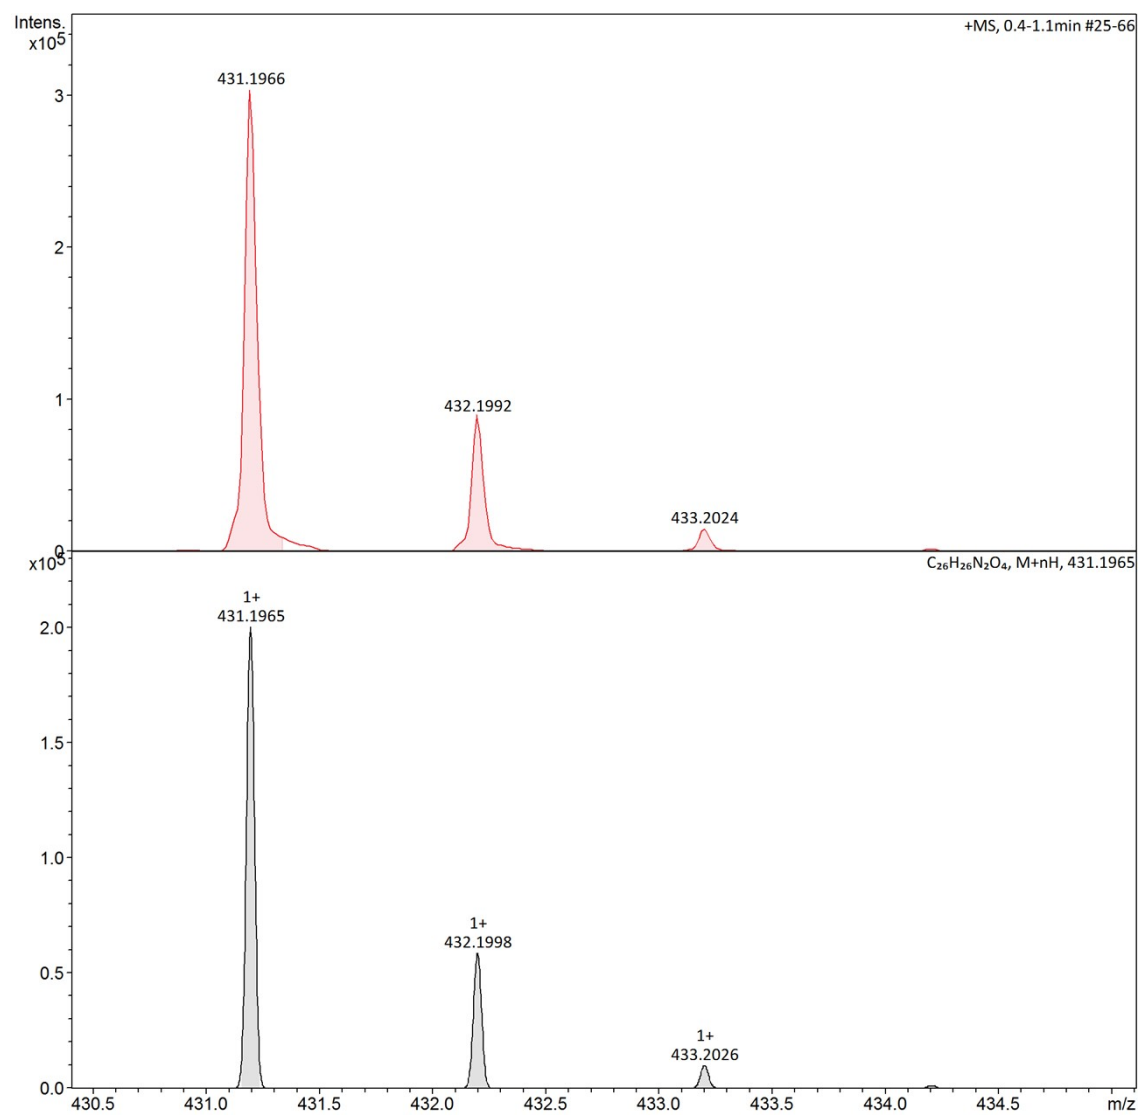

Figure 39.  $^1\text{H}$  NMR (200 MHz,  $\text{CDCl}_3$ ) of compound **2e**.

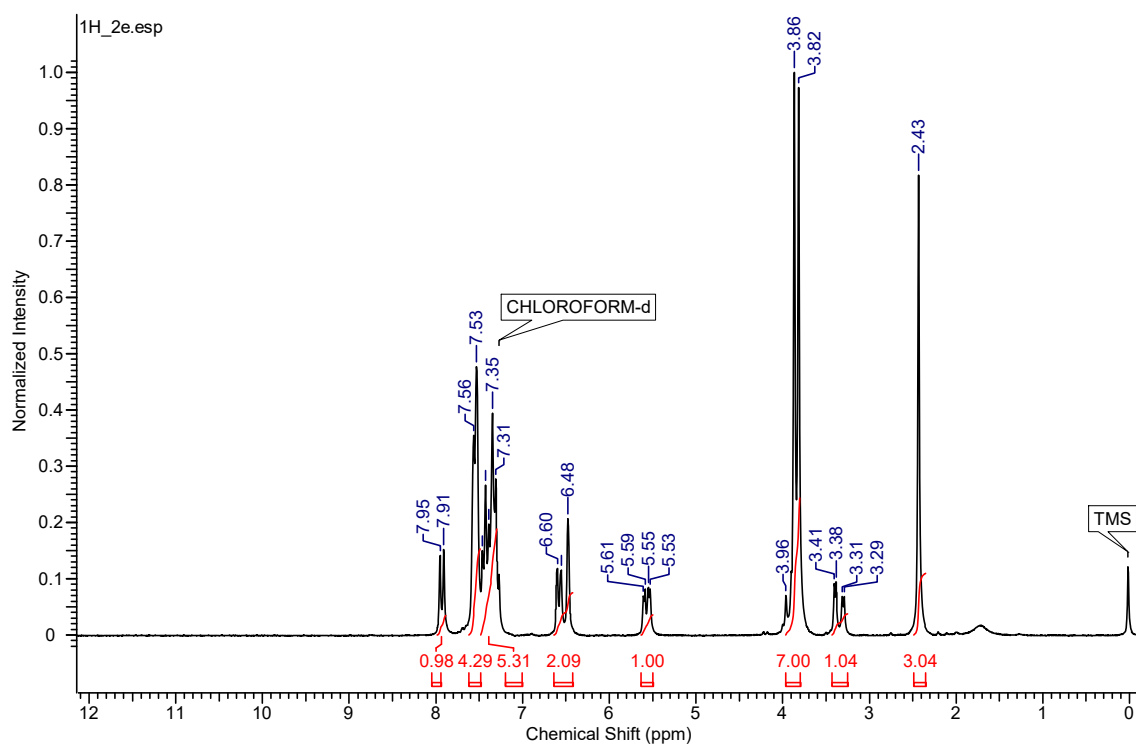

Figure 40.  $^{13}\text{C}$  NMR (50 MHz,  $\text{CDCl}_3$ ) of compound **2e**.

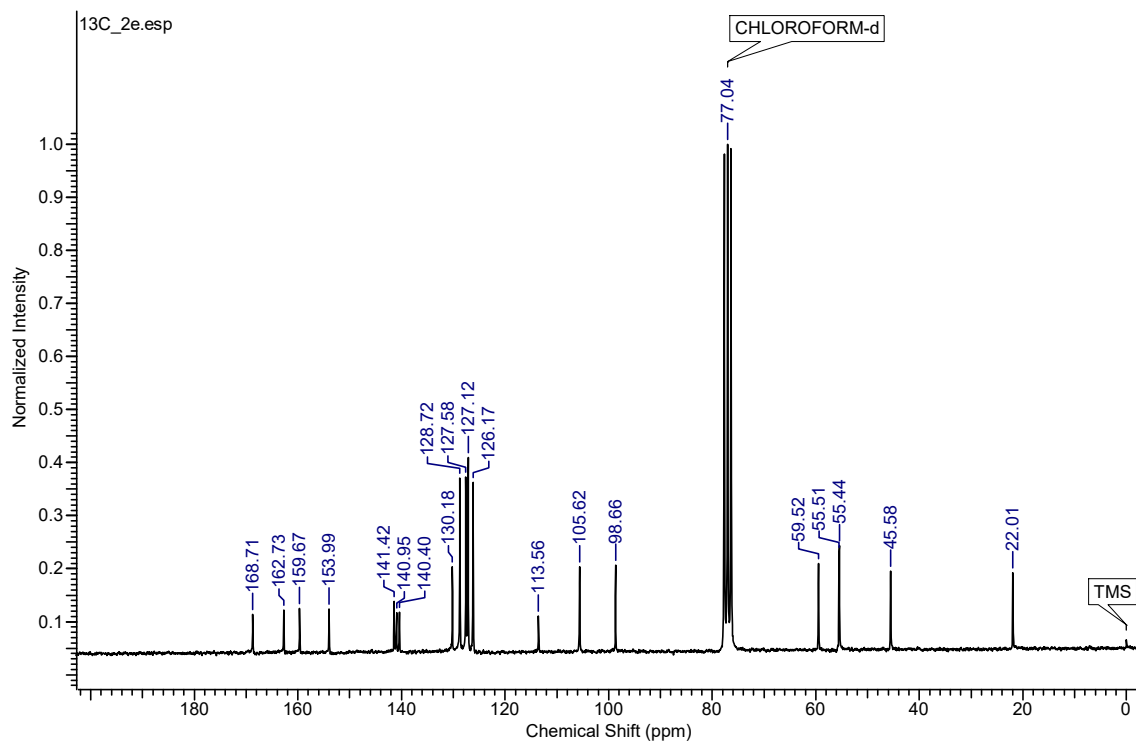

Figure 41. HR-ESI-MS of compound 2e.

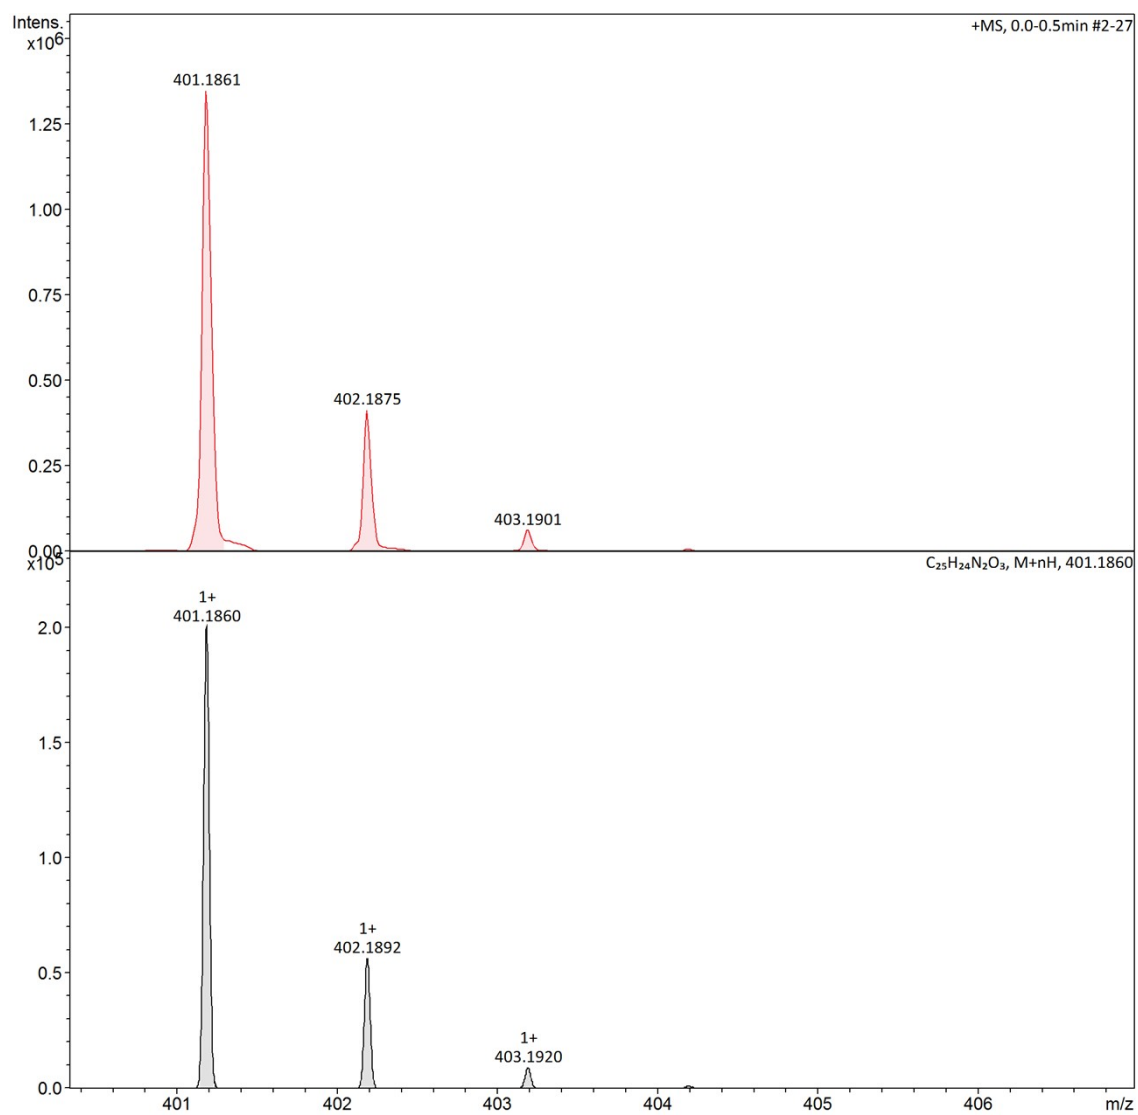

Figure 42.  $^1\text{H}$  NMR (200 MHz,  $\text{CDCl}_3$ ) of compound **2f**.

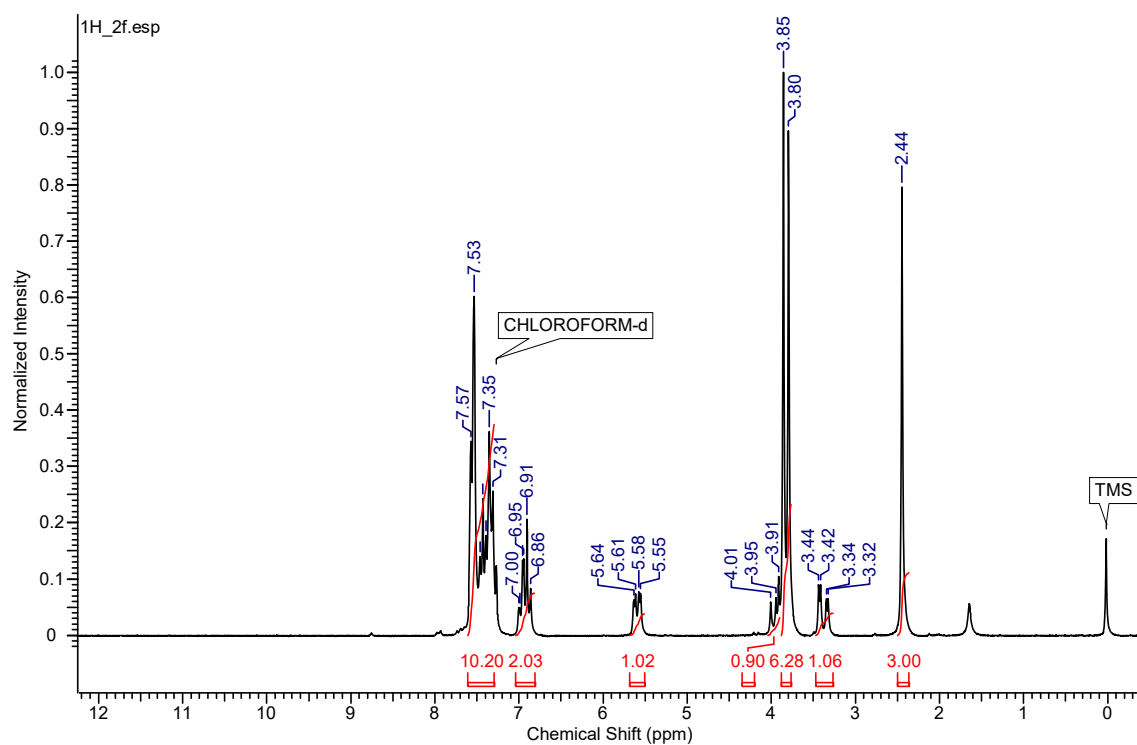

Figure 43.  $^{13}\text{C}$  NMR (50 MHz,  $\text{CDCl}_3$ ) of compound **2f**.

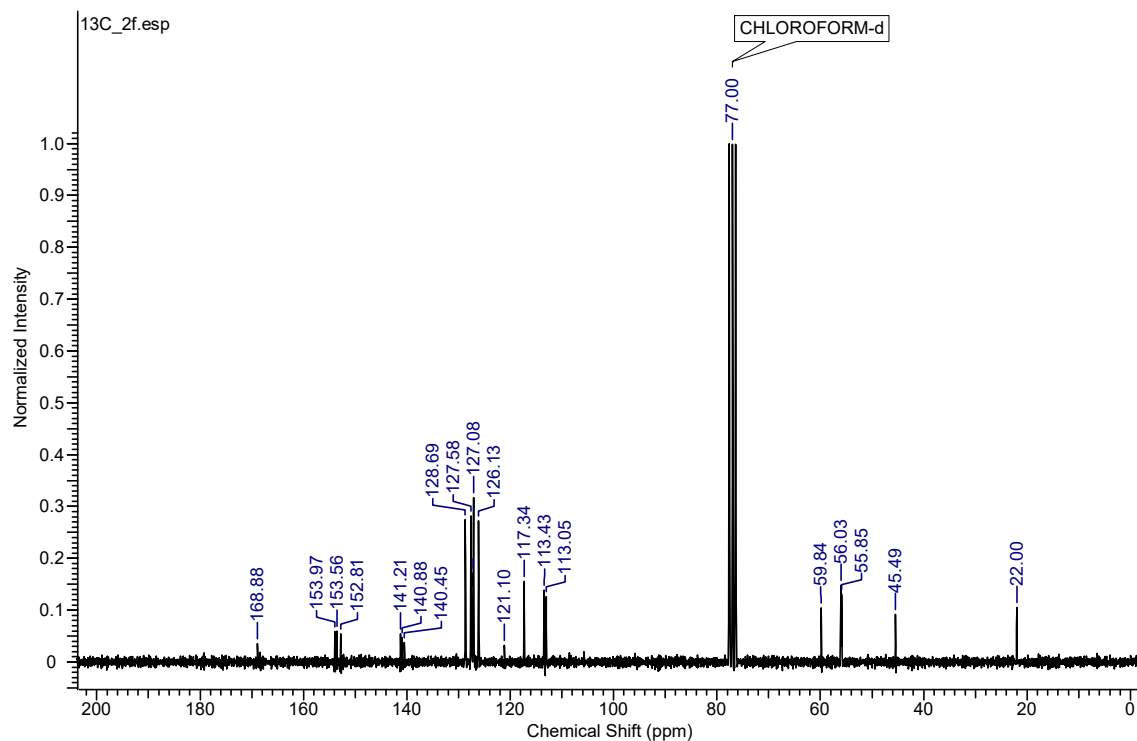

Figure 44. HR-ESI-MS of compound **2f**.

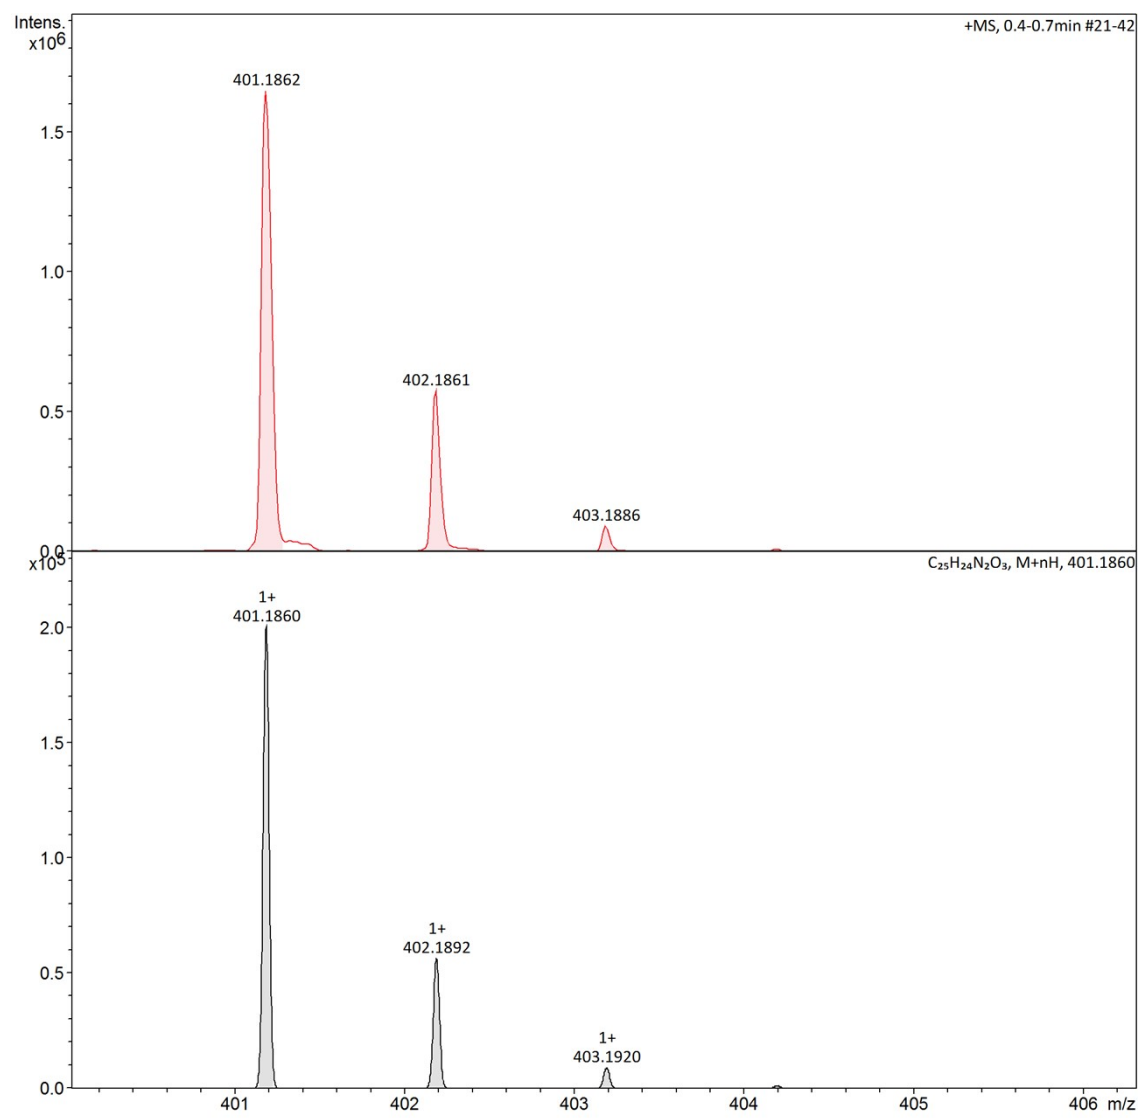



Figure 45.  $^1\text{H}$  NMR (200 MHz,  $\text{CDCl}_3$ ) of compound **2g**.

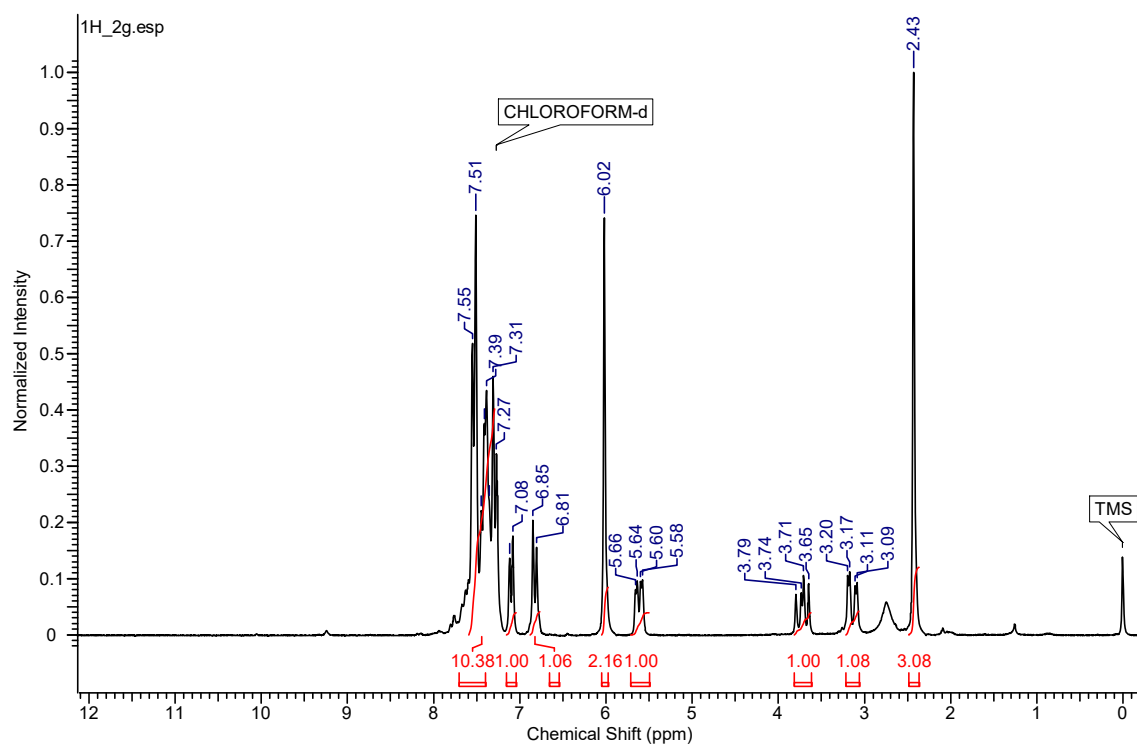

Figure 46.  $^{13}\text{C}$  NMR (50 MHz,  $\text{CDCl}_3$ ) of compound **2g**.

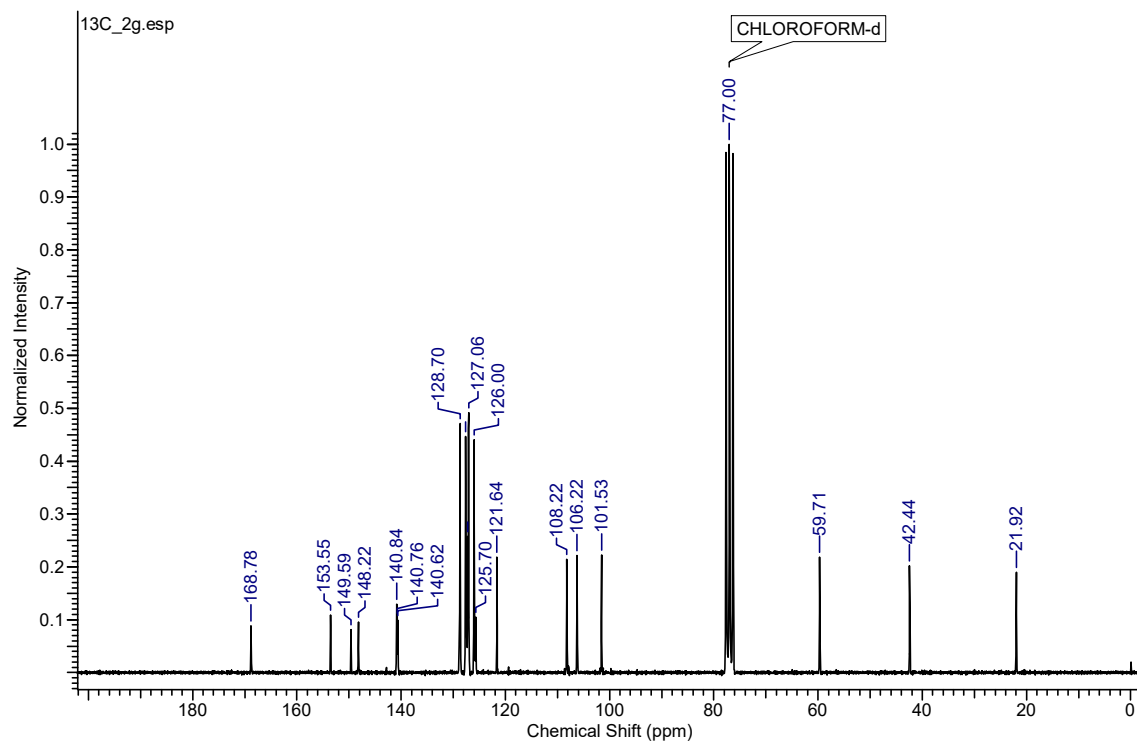

Figure 47. HR-ESI-MS of compound **2g**.

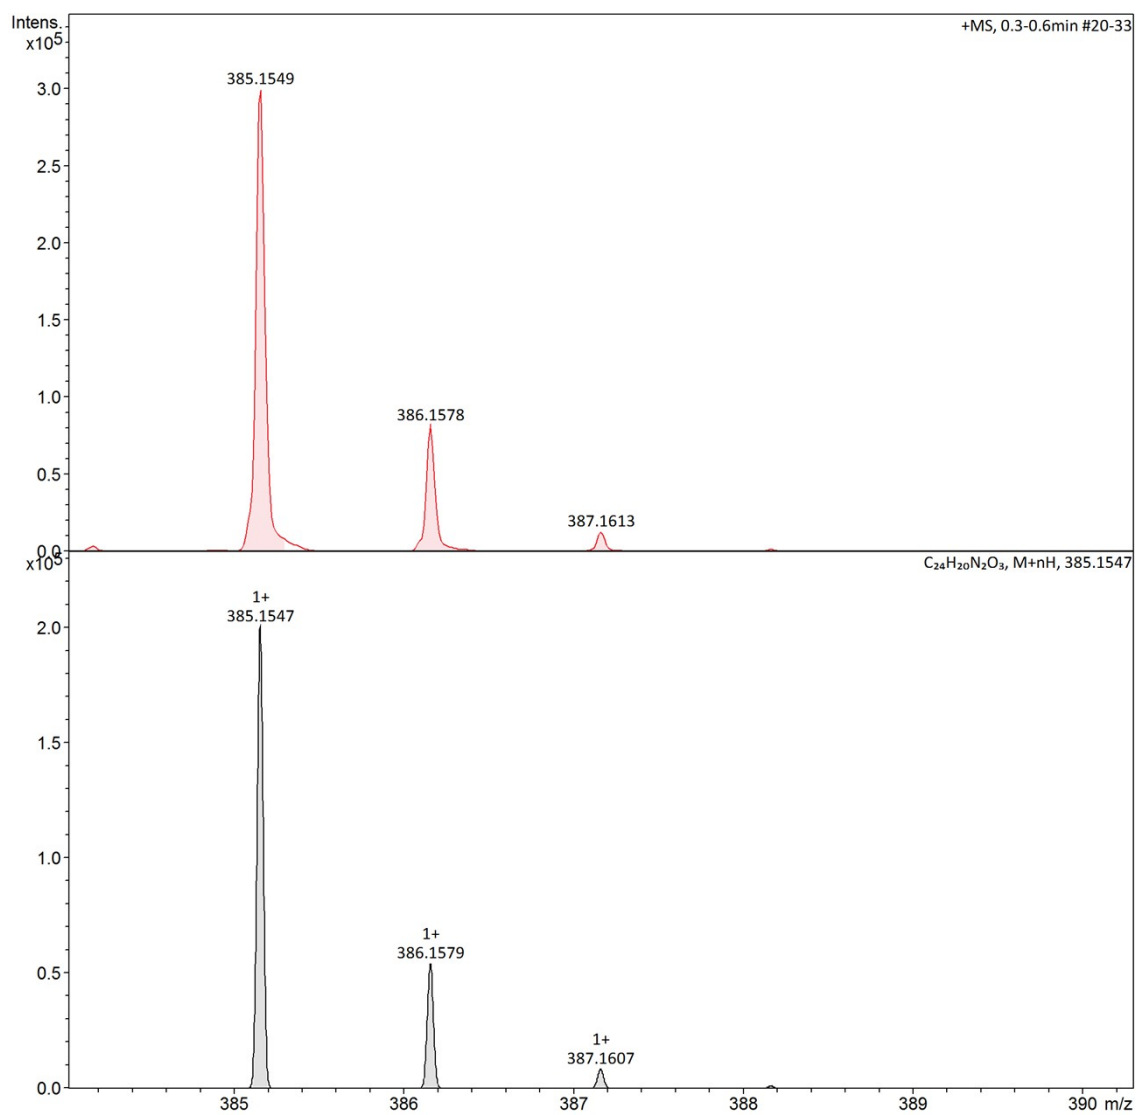

Figure 48.  $^1\text{H}$  NMR (200 MHz,  $\text{CDCl}_3$ ) of compound **2h**.

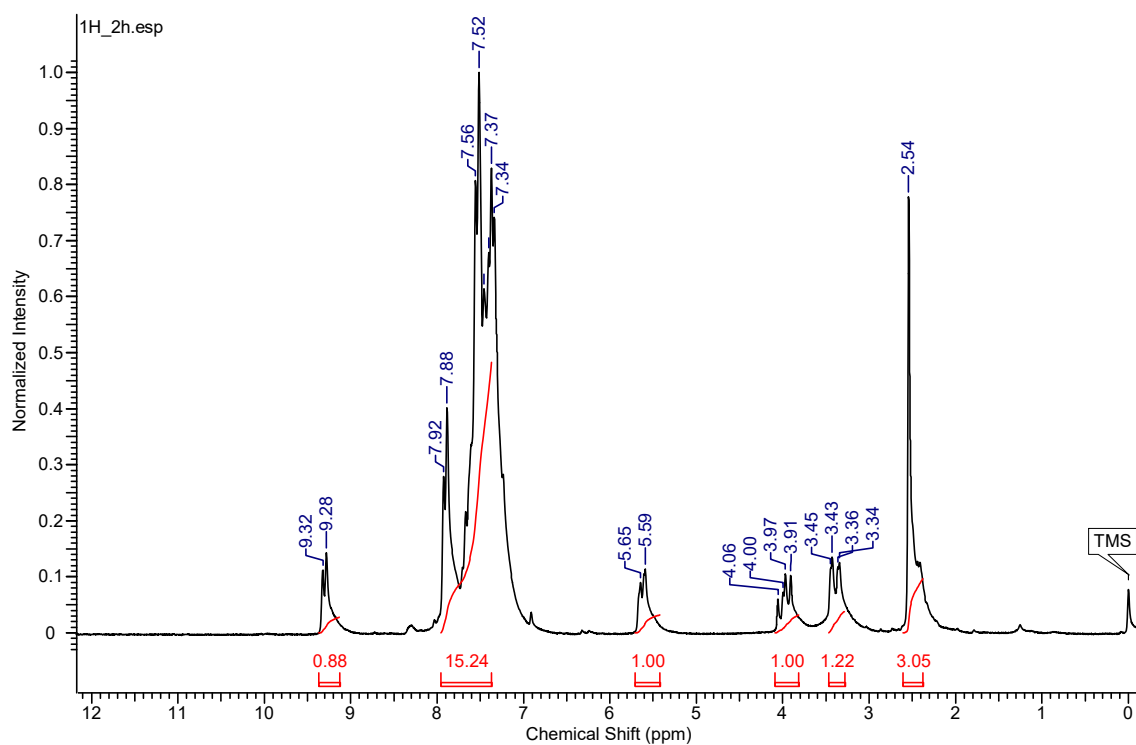

Figure 49.  $^{13}\text{C}$  NMR (50 MHz,  $\text{CDCl}_3$ ) of compound **2h**.

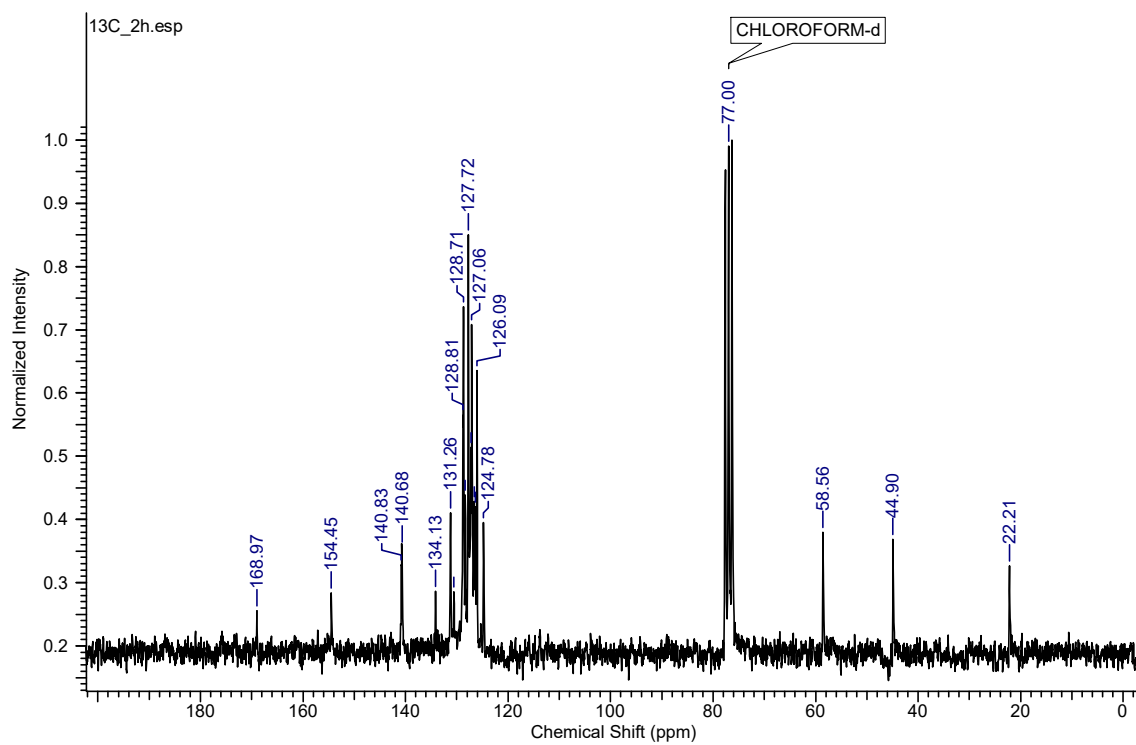

Figure 50. HR-ESI-MS of compound **2h**.

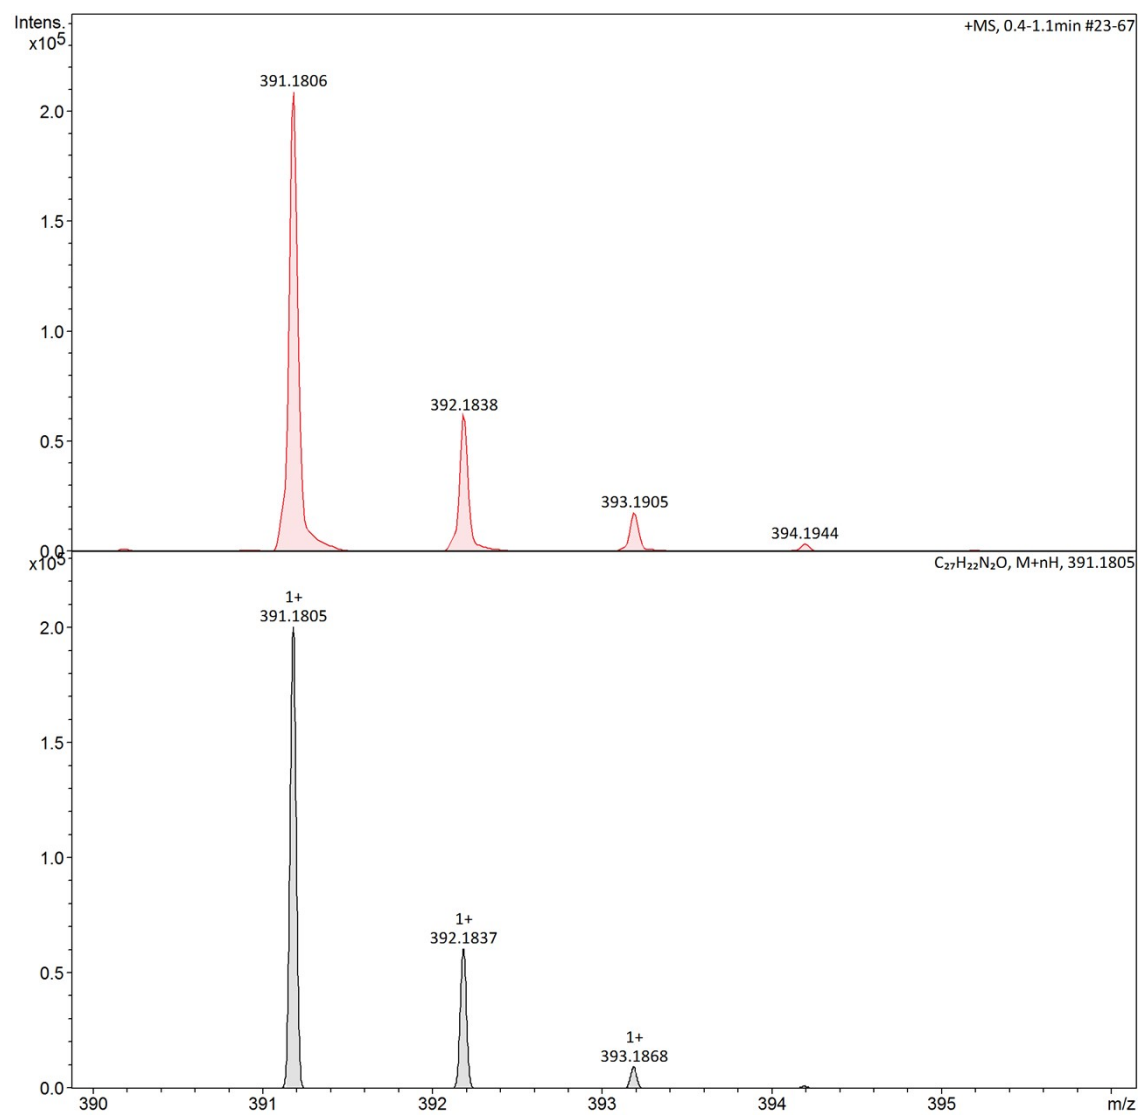

Figure 51.  $^1\text{H}$  NMR (200 MHz,  $\text{CDCl}_3$ ) of compound **2i**.

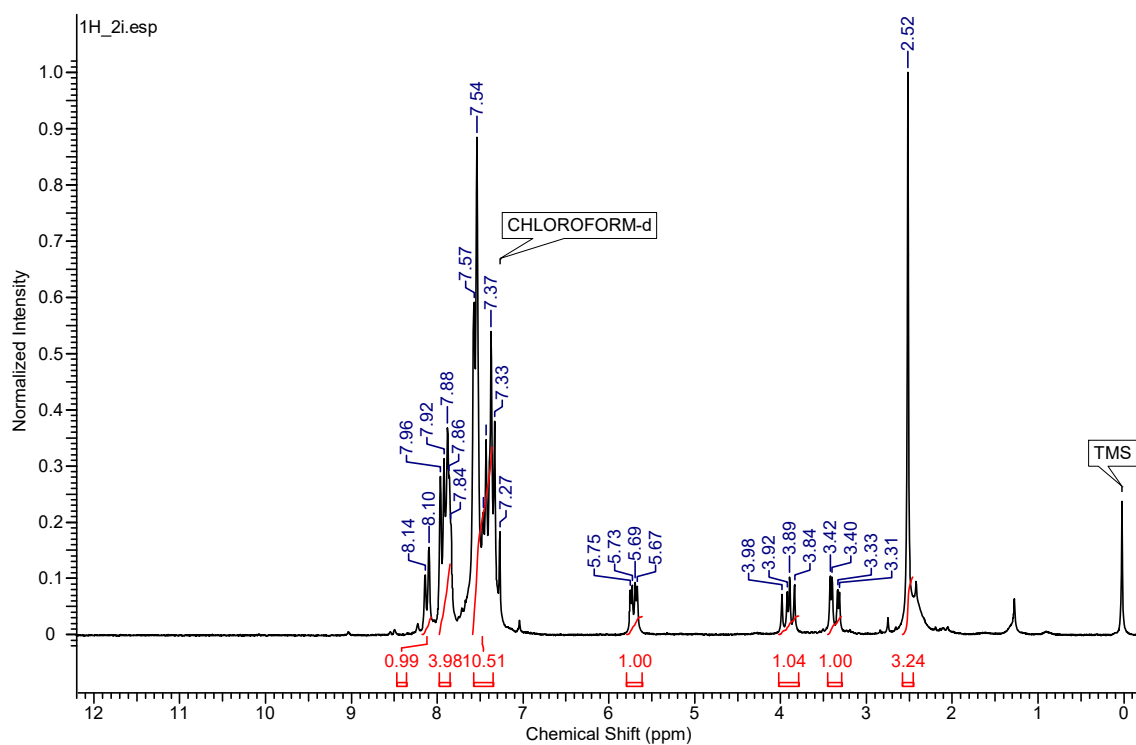

Figure 52.  $^{13}\text{C}$  NMR (50 MHz,  $\text{CDCl}_3$ ) of compound **2i**.

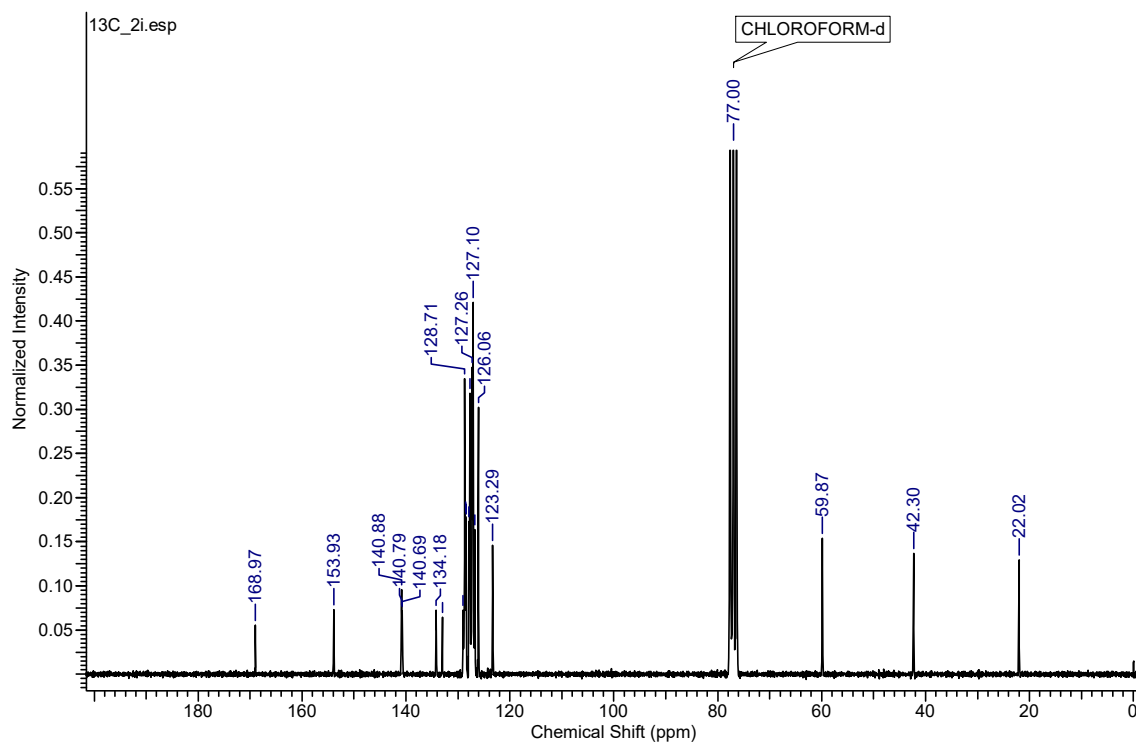

Figure 53. HR-ESI-MS of compound **2i**.

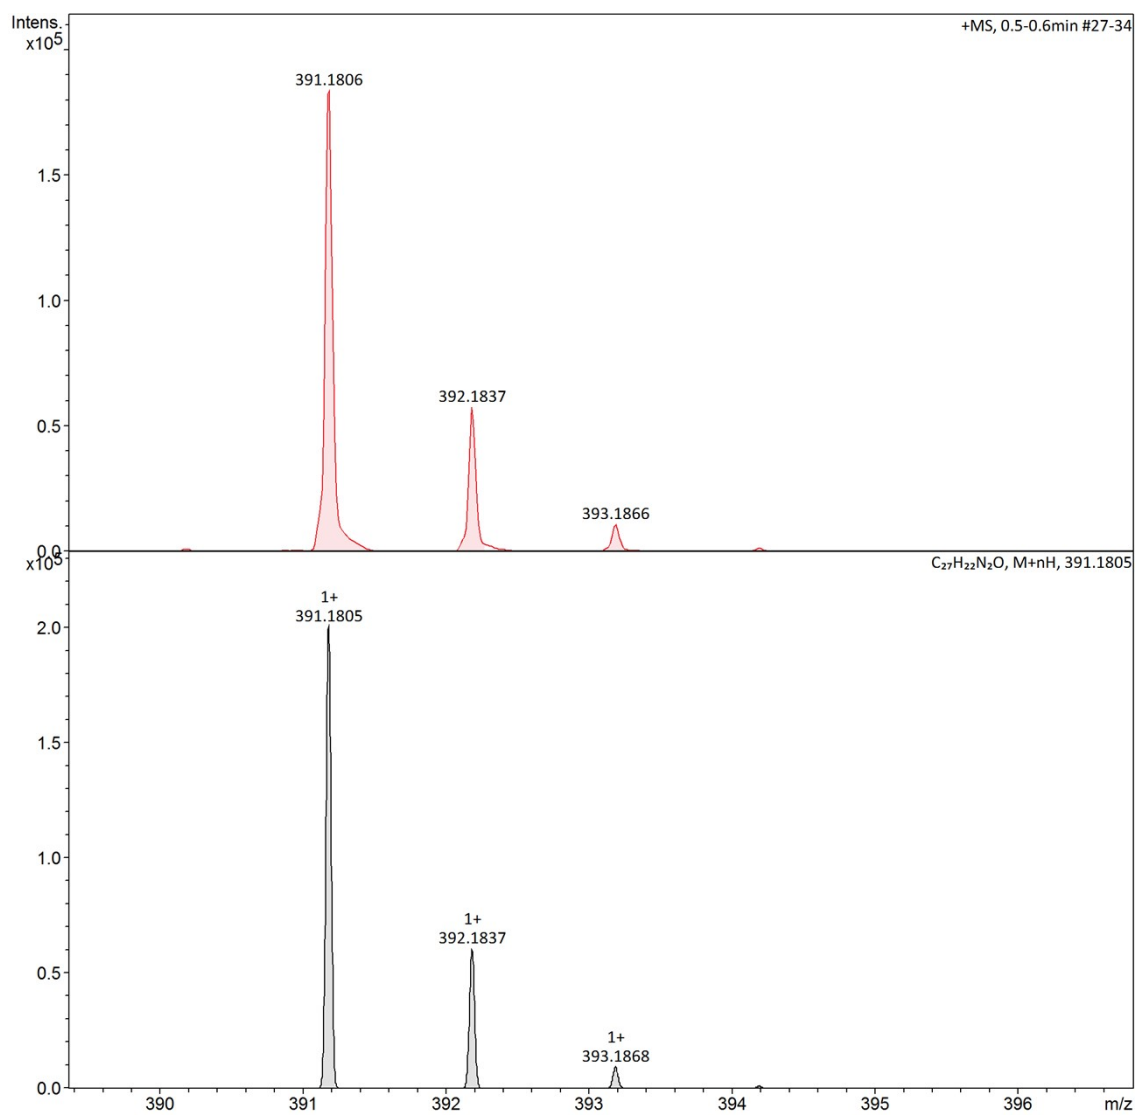

Supplement: d2md00262k1.pdf [file d2md00262k1.pdf]
